# Supplementary material for: The Mediterranean forecasting system. Part I: evolution and performance
Source: Copernicus journal article supplement (doi:10.5194/egusphere-2022-1337), 2023-01-10
Supplement: Supplementary file [file egusphere-2022-1337-EC1-supplement.pdf]

# 1 The Mediterranean forecasting system.

## 2 Part I: evolution and performance

3 Giovanni Coppini<sup>1,\*</sup>, Emanuela Clementi<sup>2</sup>, Gianpiero Cossarini<sup>3</sup>, Stefano Salon<sup>3</sup>, Gerasimos Korres<sup>4</sup>,  
4 Michalis Ravidas<sup>4</sup>, Rita Lecci<sup>1</sup>, Jenny Pistoia<sup>2</sup>, Anna Chiara Goglio<sup>2</sup>, Massimiliano Drudi<sup>1</sup>, Alessandro  
5 Grandi<sup>1</sup>, Ali Aydogdu<sup>2</sup>, Romain Escudier<sup>2,5</sup>, Andrea Cipollone<sup>2</sup>, Vladislav Lyubartsev<sup>1</sup>, Antonio  
6 Mariani<sup>1</sup>, Sergio Creti<sup>1</sup>, Francesco Palermo<sup>1</sup>, Matteo Scuro<sup>1</sup>, Simona Masina<sup>2</sup>, Nadia Pinardi<sup>6,7</sup>, Antonio  
7 Navarra<sup>6,8</sup>, Damiano Delrosso<sup>9</sup>, Anna Teruzzi<sup>3</sup>, Valeria Di Biagio<sup>3</sup>, Giorgio Bolzon<sup>3</sup>, Laura Feudale<sup>3</sup>,  
8 Gianluca Coidessa<sup>3</sup>, Carolina Amadio<sup>3</sup>, Alberto Brosich<sup>3</sup>, Arnau Miró<sup>10</sup>, Eva Alvarez<sup>3</sup>, Paolo Lazzari<sup>3</sup>,  
9 Cosimo Solidoro<sup>3</sup>, Charikleia Oikonomou<sup>4</sup>, Anna Zacharioudaki<sup>4</sup>

10 <sup>1</sup> Ocean Predictions and Applications Division, Fondazione Centro Euro-Mediterraneo sui Cambiamenti Climatici (CMCC),  
11 Italy

12 <sup>2</sup> Ocean Modeling and Data Assimilation Division, Centro Euro-Mediterraneo sui Cambiamenti Climatici (CMCC), Italy

13 <sup>3</sup> Istituto Nazionale di Oceanografia e di Geofisica Sperimentale (OGS), Italy

14 <sup>4</sup> Hellenic Centre for Marine Research (HCMR), Greece

15 <sup>5</sup> Mercator Océan International, France

16 <sup>6</sup> Centro Euro-Mediterraneo sui Cambiamenti Climatici (CMCC), Bologna, Italy

17 <sup>7</sup> Department of Physics and Astronomy, Università di Bologna, Bologna, Italy

18 <sup>8</sup> Department of Biological, Geological and Environmental Sciences (BIGEA), Università di Bologna, Bologna, Italy

19 <sup>9</sup> Istituto Nazionale di Geofisica e Vulcanologia (INGV), Italy

20 <sup>10</sup> Barcelona Supercomputing Center, Barcelona (BSC), Spain

21 *Correspondence to:* Giovanni Coppini [giovanni.coppini@cmcc.it](mailto:giovanni.coppini@cmcc.it)

22 **Abstract.** The Mediterranean Forecasting System produces operational analyses, reanalyses and 10-day forecasts for many  
23 Essential Ocean Variables (EOVs), from currents, temperature, salinity, sea level to wind waves and pelagic biogeochemistry.  
24 The products are available at a horizontal resolution of 1/24 degrees (approximately 4 km) and 141 unevenly spaced vertical  
25 levels.

26 The core of the Mediterranean Forecasting System is constituted by the physical (PHY), the biogeochemical (BIO) and the  
27 wave (WAV) components, consisting of both numerical models and data assimilation modules. The 3 components together  
28 constitute the so-called Mediterranean Monitoring and Forecasting Center (Med-MFC) of the Copernicus Marine Service.

29 Daily 10-day forecasts are produced by the PHY, BIO and WAV operational systems as well as analyses, while reanalyses are  
30 produced for the past 30 years about every ~3 years and extended (yearly). The modelling systems, their coupling strategy and  
31 evolutions are illustrated in detail. For the first time, the quality of the products is documented in terms of skill metrics  
32 evaluated on a common three-year period (2018-2020), giving the first complete assessment of uncertainties for all the  
33 Mediterranean environmental variable analyses.

## 34 1 Introduction

35 Ocean analysis and forecasting systems are now available for the global and world ocean regional seas at different spatial  
36 scales and with different numbers of Essential Ocean Variables (EOV) considered (Tonani et al., 2015). The societal drivers  
37 for the operational products stemming out of the ocean analysis and forecasting products are the safety of maritime transport,  
38 multiple coastal hazards and climate anomalies. Moreover, the operational products are at the basis of new understanding of  
39 the dynamics of the ocean circulation (Pinardi et al., 2015), its linked biogeochemical cycles, among others, carbon uptake and  
40 eutrophication (Melaku Kanu et al., 2015; von Schuckmann et al., 2020) and extreme storm surge events (Giesen et al., 2021).  
41 The ocean analysis and forecasting system for the entire Mediterranean Sea was set up in the past 15 years (Pinardi and  
42 Coppini, 2010; Pinardi et al., 2017; Lazzari et al., 2010; Salon et al., 2019; Ravdas et al., 2018; Katsafados et al., 2016) and  
43 in 2015 it became operational in the framework of the Copernicus Marine Service which is the marine component of the  
44 Copernicus Programme European Union service for a sustainable use of the ocean providing free, regular and systematic  
45 information on the state of the Blue (physical), White (sea ice) and Green (biogeochemical) ocean on the global and regional  
46 scales. The Copernicus Marine service in Europe has shown the strength of a state-of-the-art operational service implemented  
47 by hundreds of experts and teams, distributed throughout Europe, coming from public and private sectors, from operational  
48 and research organisations, from different countries, from diverse cultures and relations to the ocean (Le Traon et al., 2017;  
49 Alvarez Fanjul et al., 2022). In this paper we give an overview of the “core” components of the system, i.e., the numerical  
50 models and the data assimilation modules that represent the eddy-resolving ocean general circulation, the biogeochemical  
51 tracers and the wind waves. Furthermore, we will document the quality of EOV products using goodness indices (Brassington  
52 et al., 2017). The core components constitute the so-called Mediterranean Monitoring and Forecasting Center (Med-MFC) of  
53 Copernicus Marine Service (Le Traon et al., 2019). The integrated approach of Med-MFC system represents a unique  
54 opportunity for the users ~~who are able~~ to access state-of-the-art ~~data coupled and~~ provided in a uniform manner (e.g., same  
55 grid, unique format, unique point of access).

56  s ocean analysis and forecasting system, hereafter Med-MFC, produces analyses, 10 days forecasts and reanalysis (Adani  
57 et al., 2011; Pinardi et al., 2015; von Schuckmann et al., 2016; von Schuckmann et al., 2018; von Schuckmann et al., 2019;  
58 Terzic et al., 2021; Simoncelli et al., 2016; Simoncelli et al., 2019; Ravdas et al., 2018, Escudier et al., 2020; Escudier et al.,  
59 2021, Cossarini et al., 2021).

60 An essential task of the production activities concerns the continuous assessment of the quality of the products (Sotillo et al.,  
61 2021; Alvarez Fanjul et al., 2022) which is achieved at two levels: (i) the pre-qualification of the systems before delivering a  
62 new release, including an extensive scientific validation of the products, published in the Quality Information Documents  
63 (QUIDs) available on the Copernicus Marine Product Catalogue; (ii) the operational evaluation of the skill metrics during  
64 operations, made available through the Copernicus Marine Product Quality Dashboard Website ([https://pqd.mercator-](https://pqd.mercator-ocean.fr)  
65 [ocean.fr](https://pqd.mercator-ocean.fr)), as well as through the Mediterranean regional validation websites implemented at the level of the Med-MFC  
66 production units (PHY: <https://medfs.cmcc.it/>, WAV: <http://Med-MFC-wav.hcmr.gr/>, BIO: [www.medeaf.ogs.it/NRT-](http://www.medeaf.ogs.it/NRT-)

67 validation). All the delivered variables are thus validated with respect to satellite and in-situ observations using Copernicus  
68 Marine observational datasets, as well as additional datasets, climatologies or literature information when needed.

69 The Mediterranean Sea is a semi-enclosed basin with an anti-estuarine circulation corresponding to a  $0.9/0.8 \pm 0.06$  Sv  
70 baroclinic inflow/outflow at the Strait of Gibraltar, positive energy inputs by the winds, net buoyancy losses inducing a  
71 vigorous overturning circulation (Cessi et al., 2014; Pinardi et al., 2019). The basin scale circulation is dominated by mesoscale  
72 and sub-mesoscales variability (Pinardi et al., 2016; Bergamasco et al., 2010; Pinardi et al., 2006; Robinson et al., 2001; Ayoub  
73 et al., 1998), the former subdivided into semi-permanent and synoptic mesoscales with a spatial scale larger than 4-6 times the  
74 local Rossby radius of deformation. The stratification is large during summer in the first 50 meters and during winter the water  
75 column is practically unstratified. The Mediterranean Sea is an oligotrophic basin (Siokou-Frangou et al., 2010) with a west-  
76 to-east decreasing productivity gradient (Lazzari et al., 2012) and relatively high primary productivity in open ocean areas  
77 where winter mixing increases surface nutrients (Cossarini et al., 2019). The wave conditions are driven by the winter  
78 storminess, while summer is characterised by low significant wave height values and higher value scatter (Ravdas et al., 2018).  
79 The yearly mean wave period, as estimated from available wave buoys over the Mediterranean Sea, amounts to 3.82 s with  
80 typical deviations of 0.92 s, while the mean significant wave height is 0.82 m (1.28 m as estimated by satellite observations)  
81 with typical deviations of 0.67 m (0.77 m for satellite data).

82 In this paper we describe the final set up of the Med-MFC core components for the period 2017-2020: The Med-MFC  
83 modelling systems share the same grid resolution ( $1/24^\circ$ ), bathymetry and use the same atmospheric and river forcing fields.  
84 Moreover, daily mean fields evaluated by the physical model are used to force the wave component (surface currents) and the  
85 transport-biogeochemical model (temperature, salinity, horizontal and vertical velocities, sea level, diffusivity). This allows  
86 several model parametrizations to be calibrated to obtain the best result in term of the specific environmental variable  
87 considered by each component. In the Copernicus Marine Service the approach of forcing waves and biogeochemistry models  
88 with information from the hydrodynamic models is used and represents a standard which is also applied for the other MFCs.  
89 Several MFCs also foreseen the online coupling between physics and waves models and between physics and biogeochemical  
90 models. Furthermore, this weakly coupled system ensures an efficient development of the data assimilation modules connected  
91 to each numerical model modules and specific input data sets. It is a distributed system that shares information when and how  
92 it is required by relevant processes, with efficiency and effectiveness. Due its rather unique structure and the quality of its  
93 products the system described could be used as a basic standard for new systems to be developed.

94 The paper is organised as follows. Section 2 overviews the technical specifications of the Med-MFC components, Section 3  
95 describes the quality of the system for a reference period from 2018 to 2020 and of the forcing, Section 4 concludes the paper  
96 and presents future perspectives.

97 The Part II (or the second part) of the paper will demonstrate the capacities of the Med-MFC components in describing the  
98 Medicane effects on the ocean. In particular, the Med-MFC physics, biogeochemistry and waves components will be used to  
99 describe the effects of Medicane Zorbas (27-30 September 2018) on the ocean variables.

## 100 **2. Description of the Med-MFC core components**

101 The structure of the Med-MFC core components is shown in Figure 1: the physical component (PHY) is composed of the  
102 NEMO general circulation model (Madec et al., 2019) coupled to the WaveWatch-III (WW3) wave model (Clementi et al.,  
103 2017a) and the ocean data assimilation OceanVar 3DVAR (Dobricic and Pinardi, 2008 and Storto et al., 2015); the  
104 biogeochemical component (BIO) is composed of the Biogeochemical Flux Model (BFM), the tracer transport (OGSTM) and  
105 a data assimilation scheme (Lazzari et al., 2012; Lazzari et al., 2016; Cossarini et al., 2015; Vichi et al., 2020), forced daily by  
106 the daily mean of the PHY component fields; the wave component (WAV) is composed of the wave model WAM (WAMDI  
107 Group, 1988) and its assimilation scheme, forced daily by the daily mean of the PHY component fields. Daily 10 days forecasts  
108 are produced with all PHY, BIO and WAVE components as well as analyses and reanalyses as described below.

109 Each component of the Med-MFC has its own data assimilation system, so that important effort was made to extract the most  
110 relevant information from satellite and in- situ observations to produce analysis and correct initial conditions for the forecast  
111 in order to benefit the forecasting skills. The main goal of the paper is to present the current quality of the operational system  
112 components by comparing the analysis and - for specific variables, such as significant wave height - the background  
113 (simulation) with observations, in-situ and/or satellites. The skill of the wave and biogeochemical models is assessed by  
114 considering inter-comparisons of the model solution during the 24-h analysis phase with in-situ and remotely sensed  
115 observations. As the latter are ingested into the model through data assimilation, the first guess model fields (i.e. model  
116 background) are used instead of analyses.

### 117 **2.1. The general circulation model component**

#### 118 **2.1.1. Numerical model description**

119 The PHY numerical model component comprises a two-way coupled current-wave model based on NEMO and WW3  
120 implemented over the whole Mediterranean basin and extended into the Atlantic Sea in order to better resolve the exchanges  
121 with the Atlantic Ocean (Figure 2). The model horizontal grid resolution is  $1/24^\circ$  (ca. 4 km) and is resolved along 141 unevenly  
122 spaced vertical levels (Clementi et al., 2017b; Clementi et al., 2019). The topography is an interpolation of the GEBCO 30 arc  
123 second grid (Weatherall et al., 2015) filtered and specifically modified in critical areas such as: the Eastern Adriatic coastal  
124 areas (to avoid instabilities in circulation due to the presence of a large number of small islands), Gibraltar and Messina straits  
125 (to better represent the transports), Atlantic edges external border (to avoid large bathymetric inconsistencies with respect to  
126 the Copernicus Global Analysis and Forecast product in which the model is nested). All the numerical model choices are  
127 documented in Table A1.

128 The general circulation model considers the non-linear free surface formulation and vertical z-star coordinates. The numerical  
129 scheme uses the time-splitting formulation to solve the free surface and the barotropic equations with a (100 times) smaller  
130 time step with respect to the one used to evaluate the prognostic 3D variables (240 seconds). The active tracers (temperature  
131 and salinity) advection scheme is a mixed up-stream/MUSCL (Monotonic Upwind Scheme for Conservation Laws; Levy et

132 al., 2001) as modified in Oddo et al. (2009). The vertical diffusion and viscosity terms are defined as a function of the  
133 Richardson number, following Pacanowski and Philander (1981). The air-sea surface fluxes of momentum, mass, and heat are  
134 computed using bulk formulae described in Pettenuzzo et al. (2010) and the Copernicus satellite gridded SST data (Buongiorno  
135 Nardelli et al., 2013) is used to correct the non-solar heat flux using a relaxation constant of  $110 \text{ Wm}^{-2}\text{K}^{-1}$  centred at midnight.  
136 A detailed description of other specific features of the model implementations can be found in Tonani et al. (2008), Oddo et  
137 al. (2009) and Oddo et al. (2014).

138 The wave model WW3 is discretized by means of 24 directional bins ( $15^\circ$  resolution) and 30 frequency bins (ranging between  
139 0.05 Hz and 0.7931 Hz) to represent the wave spectral distribution. The wave model is implemented using the same bathymetry  
140 and grid of the hydrodynamic model and uses the surface currents to evaluate the wave refraction but assumes no interactions  
141 with the ocean bottom. The Mediterranean implementation of WW3 follows WAM cycle4 model physics (Gunter et al., 1993);  
142 the wind input and dissipation terms are based on Janssen's quasi-linear theory for wind-wave generation (Jansen, 1989;  
143 Jansen, 1991), the wave dissipation term is based on Hasselmann (1974) whitecapping theory according to Komen et al. (1984)  
144 and the non-linear wave-wave interaction is modelled using the Discrete Interaction Approximation (DIA, Hasselmann et al.,  
145 1985). The exchanges between the circulation and wave models are performed using an online two-way coupling between  
146 NEMO and WW3. The models are forced by the same atmospheric fields (high resolution ECMWF analysis and forecast  
147 winds) and are two-way coupled at hourly intervals exchanging the following fields: NEMO sends to WW3 the sea surface  
148 currents and temperature which are then used to evaluate the wave refraction and the wind speed stability parameter,  
149 respectively. The neutral drag coefficient computed by WW3 is passed to NEMO to compute the surface wind stress.  
150 The NEMO-WW3 coupled system is intended to provide the representation of current-wave interaction processes in the ocean  
151 general circulation. At the moment the feedback is considered only for the surface wind stress drag coefficient and more details  
152 on this wave-current model coupling can be found in Clementi et al. (2017a).

### 153 **2.1.2. Model initialization, external forcing and boundary conditions**

154 The PHY component was initialised in January 2015 using temperature and salinity winter climatological fields from WOA13  
155 V2 (World Ocean Atlas 2013 V2, <https://www.nodc.noaa.gov/OC5/woa13/woa13data.html>). The atmospheric forcing fields  
156 for both NEMO and WW3 models are from the  $1/8^\circ$  horizontal resolution at 6 hours temporal frequency (3 hours frequency is  
157 used to force the first 3 days of forecast) operational analysis fields from the European Centre for Medium-Range Weather  
158 Forecast (ECMWF) Integrated Forecasting System (IFS), a higher spatial resolution of  $1/10^\circ$  (with higher forecast temporal  
159 frequency of 1-3-6 hours according to the forecast leading time) is used starting from year 2020.

160 The circulation model's lateral open boundary conditions (LOBC) in the Atlantic Ocean are provided by the Copernicus Global  
161 Analysis and Forecast product (Lellouche et al., 2018) at  $1/12^\circ$  horizontal resolution and 50 vertical levels. Daily mean fields  
162 are used, and the numerical schemes applied at the open boundaries are the Flather (1976) radiation scheme for the barotropic  
163 velocity and the Orlanski (1976) radiation condition (normal projection of oblique radiation case) with adaptive nudging  
164 (Marchesiello et al., 2001) for the baroclinic velocity and the tracers. The nesting technique is detailed in Oddo et al. (2009),

165 who also show a marked improvement in the salinity characteristics of the Modified Atlantic Water and in the Mediterranean  
 166 sea level seasonal variability. The Dardanelles Strait boundary conditions (Delrosso, 2020) consist of a merge between the  
 167 Copernicus global ocean products and daily climatology derived from a Marmara Sea box model (Maderich et al., 2015). The  
 168 WW3 model implementation considers closed boundaries in both Atlantic Ocean and Dardanelles strait.  
 169 The river runoff inputs consist of monthly climatological data for 39 major rivers (characterized by an average discharge larger  
 170 than  $50 \text{ m}^3/\text{s}$ ) with a prescribed constant salinity at river mouth (Delrosso, 2020) evaluated by means of sensitivity experiments  
 171 and listed in Table A.4. More realistic and time varying river salinity values (at least for major rivers) will be evaluated in  
 172 future modeling evolutions using an estuary box model, such as the one presented in Verri et al. (2020), coupled to the  
 173 hydrodynamic model.

### 174 **2.1.3 The data assimilation component**

175 A 3D-variational data assimilation scheme, called OceanVar, initially developed by Dobricic and Pinardi (2008) and further  
 176 improved for a wide range of ocean data assimilation applications (Storto et al., 2015) is coupled to NEMO.

177 The OceanVar scheme aims to minimise the cost function as described in the following Eq. (1):

$$178 \quad J = \frac{1}{2} \delta x^T B^{-1} \delta x + \frac{1}{2} (H \delta x - d)^T R^{-1} (H \delta x - d), \quad (1)$$

180 where  $\delta x = x - x_b$ , and  $x$  is the unknown ocean state, equal to the analysis  $x_a$  at the minimum of  $J$ ,  $x_b$  is the background state,  
 181  $d = y - H(x_b)$  is the misfit between an observation  $y$  and its modelled correspondent mapped onto the observation space to  
 182 the observation location by the observation operator,  $H$ .

183 In OceanVar, the background error covariance matrix is considered as  $B = VV^T$ , where  $V$  is a sequence of linear operators:  
 184  $V = V_\eta V_H V_V$ . Multivariate EOFs (Empirical Orthogonal Functions, described in Dobricic et al., 2006 and Pistoia et al., 2017)  
 185 compose the vertical component operator,  $V_V$ . EOFs are computed in every grid point for the sea surface height, temperature  
 186 and salinity using a three-year simulation in order to capture the mesoscale eddy variability that is assumed to represent the  
 187 unbalanced component of the background error covariance. The horizontal covariances,  $V_H$ , are modelled by an iterative  
 188 recursive filter (Dobric and Pinardi, 2008; Storto et al., 2014). In order to assimilate altimeter observations, the dynamic height  
 189 operator,  $V_\eta$ , developed in Storto et al. (2011) is used. A reference level of 1000 m is used for this operator so SLA along track  
 190 observations over water shallower than this depth are not assimilated.

191 The observational error covariance matrix,  $R$ , is estimated following Desroziers et al. (2005) relationship. The assimilated  
 192 observations include along-track altimeter sea level anomaly from six satellites and in-situ vertical temperature and salinity  
 193 profiles from Argo floats. The SLA tracks provided by nadir altimeters are assimilated by subsampling every second  
 194 observation to reduce the spatial correlation between consecutive measurements. A special quality control procedure is applied  
 195 to the Argo data before they are assimilated. It consists of removing not ~~good quality profiles, rejecting observations with~~  
 196

197 negative temperature and/or salinity, temperature higher than 45° C and salinity higher than 45 PSU, removing profiles with  
198 gaps in the observations of more than 40 m in the first 300 m depth (to avoid possible inconsistencies in the thermocline),  
199 profiles with observations provided only below 35 m depth and observations in the 1<sup>st</sup> model layer (0-2 m). Moreover, a  
200 background quality check is implemented to reject observations whose square departure exceeds the sum of the observational  
201 and background-error variances 64 times in case of SLA and 25 times in case of in-situ temperature and salinity. The quality  
202 checks are applied to each individual observation of each Argo vertical profile and for each altimeter track. The misfits are  
203 computed at the observation time by applying the FGAT (First Guess at the Appropriate Time) procedure and the corrections  
204 to the background are applied once a day to the restart file using observations within a one-day time window.

## 205 **2.2. The wind wave component**

### 206 **2.2.1. Numerical model description**

207 The WAV component consists of two nested wave model implementations: the first grid covers the whole Mediterranean Sea  
208 at 1/24° horizontal resolution and it is nested within a coarser resolution wave model grid at 1/6° horizontal resolution  
209 implemented over the Atlantic Ocean (Figure 2).

210 The wave model is based on the state-of-the-art third generation WAM Cycle 4.6.2 which is a modernised and improved  
211 version of the well-known and extensively used WAM Cycle 4 wave model (WAMDI Group, 1988; Komen et al., 1994).  
212 WAM solves the wave transport equation explicitly without any presumption on the shape of the wave spectrum. Its source  
213 terms include the wind input, whitecapping dissipation, nonlinear transfer, and bottom friction. The wind input term is adopted  
214 from (Snyder et al., 1981). The whitecapping dissipation term is based on (Hasselmann, 1974) whitecapping theory. The wind  
215 input and whitecapping dissipation source terms of the present cycle of the wave model are a further development based on  
216 Janssen's quasi-linear theory of wind-wave generation (Jansen, 1989; Jansen, 1991). The nonlinear transfer term is a  
217 parameterization of the exact nonlinear interactions (Komen et al., 1984 and Hasselmann et al., 1985). Lastly, the bottom friction  
218 term is based on the empirical JONSWAP model of (Hasselmann et al., 1973).

219 The bathymetric map has been constructed using the GEBCO 30arc-second bathymetric data set for the Mediterranean Sea  
220 model and the ETOPO 2 data set (U.S. Department of Commerce, National Oceanic and Atmospheric Administration, National  
221 Geophysical Data Centre, 2006. 2-minute Gridded Global Relief Data) for the North Atlantic model. In both cases mapping  
222 on the model grid was done using bi-linear interpolation accompanied by some degree of isotropic Laplacian smoothing. This  
223 bathymetry is different from the one used for the PHY component, optimized for the specific quality of the wave products.

224 The wave spectrum is discretized using 32 frequencies, which cover a logarithmically scaled frequency band from 0.04177 Hz  
225 to 0.8018 Hz (covering wave periods ranging from approximately 1 s to 24 s) at intervals of  $df/f = 0.1$  and 24 equally spaced  
226 directions (15 degrees bin). The WAV model component runs in shallow water mode considering wave refraction due to depth  
227 and currents in addition to depth-induced wave breaking. Modifications from default values of WAM 4.6.2 have been  
228 performed in the input source functions as a result of a tuning procedure. Specifically, the value of the wave age shift parameter

229 (ZALP) in the wind input source function was set to 0.011 (0.008 is the default) for the Mediterranean model and the tunable  
230 whitecapping dissipation coefficients  $C_{DS}$  and  $\delta$  were altered from their default values to become  $C_{DS}=1.33$  (2.1 default) and  
231  $\delta = 0.5$  (default value was 0.6). Finally, a limitation to the high-frequency part of the wave spectrum corresponding to the  
232 Cy43r1 ECMWF wave forecasting system (ECMWF, 2016) was also implemented and tested in order to reduce the wave  
233 steepness at very high wind speeds.

### 234 235 **2.2.2. Model initialization, external forcing and boundary conditions**

236 The WAV component is forced with 10 m above sea surface analysis and forecast ECMWF winds at  $1/8^\circ$  dissemination  
237 resolution. The temporal resolution is 6 h for the analysis, 3 h for the first 3 days of the forecast and 6 h for the rest of the  
238 forecast cycle. From year 2021, a higher spatial ( $1/10^\circ$  for both analysis and forecast) and temporal (hourly for forecast days  
239 1-3, 3-hourly for days 4-6 and 6-hourly for days 7-10) resolution dataset is used to force the WAV component. The wind is  
240 bi-linearly interpolated onto the model grids. Sea ice coverage fields used by the North Atlantic wave model are also obtained  
241 from ECMWF. With respect to currents forcing, the WAV model is forced by daily averaged surface currents obtained from  
242 Copernicus Marine Service Med MFC at  $1/24^\circ$  resolution and the North Atlantic model is forced by daily averaged surface  
243 currents obtained from the Copernicus global physical model at  $1/12^\circ$  resolution. The WAV component runs one cycle per day  
244 operating in analysis (for 24 hours in the past - previous day) and forecast (for 10 days in the future) modes. During the analysis  
245 phase, model background is blended through data assimilation with available SWH satellite observations at 3-hourly intervals  
246 and forced with ECMWF analyses 6-hourly winds and daily averaged surface currents.

247 The Mediterranean Sea model receives a full wave spectrum at 5-min intervals at its Atlantic Ocean open boundary from the  
248 WAM implementation in the North Atlantic. The latter model is considered to have all its four boundaries closed assuming no  
249 wave energy propagation from the adjacent seas. This assumption is readily justified for the north and west boundaries of the  
250 North Atlantic model considering the adjacent topography which restricts the development and propagation of swell into the  
251 model domain.

252

### 253 **2.2.3 The wave data assimilation component**

254 The assimilation module of the WAV component is based on the data assimilation scheme of WAM Cycle 4.6.2 which consists  
255 of an Optimal Interpolation (OI) of the along-track Significant Wave Height (SWH) observations retrieved by altimetry and  
256 then re-adjusting the wave spectrum at each grid point accordingly. This assimilation approach was initially developed by  
257 Lionello et al. (1992) and consists of two steps. First, a best guess (analysed) field of significant wave height is determined by  
258 OI with appropriate assumptions regarding the error covariance matrix. One of the key issues is the specification of the  
259 background error covariance matrix, for the waves called P, and the observation error covariance matrix, R. The first is defined  
260 as in the following Eq. (2):



261  $P = \exp\left(\frac{d_{ij}}{l_c}\right),$  (2)

262 while the second is Eq. (3):

263  
264  $R = \frac{\sigma_o^2}{\sigma_b^2},$  (3)

265  
266 where  $i$  and  $j$  are the model grid points in the longitudinal and latitudinal directions respectively,  $d$  is the distance of the  
267 observation location to the grid point,  $l_c$  is the field correlation length, while  $\sigma_o^2$  and  $\sigma_b^2$  stand for the observation and model  
268 errors, respectively. In the above expressions the error is considered as being homogeneous and isotropic. We use  $R=1$  and the  
269 correlation length  $l_c$  equal to 3 deg (~300 km).

270 Finally, the weights assigned to the observations are the elements of the gain matrix  $K$  as presented in Eq. (4):

271  
272  $K = PH^T [HPH^T + R]^{-1},$  (4)

273  
274 where  $H$  is the observation operator that projects the model solution to the observation location. For the current version of  
275 Med-waves, the OI analysis procedure is applied only to altimeter along-track SWH measurements although wind at 10 m  
276 measurements can be assimilated as well. Prior to OI procedure, quality checked SWH observations which are available in a  
277  $\pm 1.5$  hours time window are collocated with the closest model grid point and averaged.

278 During the second step, the analysed significant wave height field is used to retrieve the full dimensional wave spectrum from  
279 a first-guess spectrum provided by the model itself, introducing additional assumptions to transform the information of a single  
280 wave height spectrum into separate corrections for the wind sea and swell components of the spectrum. Two-dimensional wave  
281 spectra are regarded either as wind sea spectra, if the wind sea energy is larger than 3/4 times the total energy, or, if this  
282 condition is not satisfied, as swell. If the first-guess spectrum is mainly wind-sea, the spectrum is updated using empirical  
283 energy growth curves from the model. In case of swell, the spectrum is updated assuming the average wave steepness provided  
284 by the first-guess spectrum is correct, but the wind is not updated.

285 Prior to assimilation, all altimeter SWH observations are subject to a quality control procedure. Every day the system is  
286 scheduled to simulate 264 hours: 24 hours in the past (analysis) blending through data assimilation model results with all  
287 satellite SWH observations available followed by 240 hours forecast. The assimilation step adopted for the current version of  
288 the Med-waves system equals to 3 hours.

## 289 **2.3 Mediterranean biogeochemical component**

### 290 **2.3.1. Numerical model description**

291 The BIO component consists of the Biogeochemical Flux Model (BFM, Vichi et al., 2007) coupled with the transport  
292 (OGSTM) module (Salon et al., 2019). Advection, vertical and horizontal diffusion and the sinking term for the  
293 biogeochemical tracers (Foujols et al., 2000) are solved by the OGSTM module that uses daily 3D velocity, diffusivities and

294 2D atmospheric fields provided by the PHY component through the offline coupling scheme (Figure 1). A source splitting  
295 numerical time integration is used to couple advection and diffusion to the biochemical tracer rates.  
296 BFM describes the biogeochemical cycles of carbon, nitrogen, phosphorus, silicon and oxygen through the dissolved inorganic  
297 and the particulate living and non-living organic compartments (Lazzari et al., 2012; Lazzari et al., 2016). The model includes  
298 four phytoplankton functional groups (i.e., diatoms, flagellates, picophytoplankton and dinoflagellates), four zooplankton  
299 groups (i.e., carnivorous, and omnivorous mesozooplankton, heterotrophic nanoflagellates and microzooplankton) and  
300 heterotrophic bacteria. Among the nutrients, dissolved inorganic nitrogen is simulated in terms of nitrate and ammonia. The  
301 non-living dissolved organic compartment includes labile, semi-labile and refractory organic matter. A carbonate system  
302 component (Cossarini et al., 2015) includes alkalinity (ALK), dissolved inorganic carbon (DIC) and particulate inorganic  
303 carbon (PIC) as prognostics variables, computes CO<sub>2</sub> air-sea gas exchange according to Wanninkhof (2014) and provides  
304 diagnostics variables such as pH, CO<sub>2</sub> concentration and calcite saturation horizon.

### 305 306 **2.3.2. Model initialization, external forcing and boundary conditions**

307 Initial condition of nutrients (nitrate, ammonia, silicate and phosphate), oxygen and carbonate variables (DIC and alkalinity)  
308 consist of 16 climatological profiles homogeneously applied in each of the sub-regions represented in Figure 3.  
309 Climatological profiles are computed from the EMODnet dataset (Bugu et al., 2018). The other biogeochemical state variables  
310 (phytoplankton, zooplankton and bacteria biomasses) are initialised in the photic layer (0–200 m) according to the standard  
311 BFM values. A 5-year hindcast is run using the first year (i.e. 2017) in perpetual mode. ~~The model has two open lateral~~  
312 ~~conditions: in the Atlantic Ocean and at the Dardanelles Strait.~~ The model has two open lateral conditions: in the Atlantic  
313 Ocean and in the Dardanelles Strait. Nutrients, oxygen, DIC and alkalinity in the Atlantic (i.e., boundary at lon=9°W) are  
314 provided through seasonally varying climatological profiles derived from World Ocean Atlas (WOA 2018) and literature  
315 (Alvarez et al., 2014) and a Newtonian dumping is applied. The Newtonian dumping is set between the longitudes 9°W and  
316 6.5°W with a time scale relaxation term linearly varying from 1/24 1/d at 9°W to 90 1/d at 6.5°W. A Dirichlet-type scheme  
317 with constant concentration values of nutrients, DIC and alkalinity derived from literature (Yalcin et al., 2017; Tugrul et al.,  
318 2002; Souvermezoglou et al., 2014; Copin-Montegut, 1993; Schneider et al., 2007; Krasakopoulou et al., 2017) is applied at  
319 the Dardanelles Strait. The concentrations are also tuned to provide input fluxes from Black Sea to the Mediterranean Sea  
320 consistent with published estimates (Deliverable of Perseus, 2020; Yalcin et al., 2017; Tugrul et al., 2002; Copin-Montegut,  
321 1993). A radiative condition is set for the other BFM tracers.

322 Terrestrial inputs include 39 rivers consistently with the PHY component. Annual nutrients input are about 46500 10<sup>6</sup> molN/y  
323 and 881 10<sup>6</sup> molP/y (Salon et al., 2019). Carbon and alkalinity inputs are 9300 10<sup>9</sup> gC/y and 800 10<sup>9</sup> mol/y, respectively.  
324 Estimates are derived considering typical concentrations per freshwater mass in macro coastal areas of the Mediterranean Sea  
325 (Copin-Montegut, 1993; Meybeck and Ragu, 1995; Kempe et al., 1991) and the river water discharges from the PERSEUS  
326 dataset (Deliverable of Perseus, 2012 as before). Annual atmospheric nutrient depositions are 81300 10<sup>6</sup> molN/y and 1194 10<sup>6</sup>  
327 molP/y for nitrogen and phosphorus, respectively (Ribera d'Alcalà et al., 2003). Spatially constant values of atmospheric pCO<sub>2</sub>

328 are derived from the 1992-2018 time series of the ENEA Lampedusa station (Trisolino et al., 2021) with the 2019 and 2020  
329 values extrapolated by linear trend.

### 330 **2.3.3 The biogeochemical data assimilation component**

331 The BIO component features a variational data assimilation scheme (3DVarBio) which is based on the minimization of the  
332 cost function (Eq. 1) (Teruzzi et al., 2014). Minimization is computed iteratively in a reduced space using an efficient parallel  
333 PETSc/TAO solver (Teruzzi et al., 2019) and the background error covariance matrix,  $B$ , is factored as  $B = VV$ , where  $V$  is a  
334 sequence of linear operators:  $V = V_B V_H V_V$ . The horizontal error covariance operator ( $V_H$ ) is a gaussian filter and includes non-  
335 uniform and direction-dependent length scale correlation radius to account for anisotropic coastal assimilation (Teruzzi et al.,  
336 2018) and vertical profile assimilation (Cossarini et al., 2019). The vertical error covariance operator ( $V_V$ ) is based on a set of  
337 0-200 m vertical error profiles obtained using an empirical orthogonal functions (EOFs) decomposition of a 20-yearlong  
338 pre-existing biogeochemical simulation. EOFs are computed monthly for the 16 subregions with the actual vertical resolution  
339 and rescaled at each grid-point considering the ratio between observation and model variances (Teruzzi et al., 2018). The  
340 biogeochemical error covariance operator ( $V_B$ ) is designed to preserve the ratios among phytoplankton functional types and  
341 their internal carbon to nutrient quotas (Teruzzi et al., 2014) and supports monthly and spatial varying covariances between  
342 dissolved inorganic nutrients (Teruzzi et al., 2021). In the most recent BIO model configuration (Teruzzi et al., 2021; Cossarini  
343 et al., 2019), the assimilated biogeochemical observations are satellite multi-sensor (MODIS, VIIRS and OLCI) surface  
344 chlorophyll data (Volpe et al., 2019) and quality-controlled BGC-Argo nitrate and chlorophyll profiles (Schmechtig et al.,  
345 2018; Johnson et al., 2018). Ocean colour data are interpolated from original 1km resolution to the  $1/24^\circ$  model resolution.

346

### 347 **2.4 Systems evolutions**

348 The Mediterranean has been the site of major forecasting research activities since the late nineties (Pinardi and Woods, 2001,  
349 Pinardi et al., 2003; Pinardi and Coppini, 2010). Before 2008, only the PHY and BIO components were present. The PHY  
350 component was based on the Ocean Parallelise (OPA) code (Madec et al., 1998) with the highest available horizontal and  
351 vertical resolution of  $1/16^\circ$  degrees (approx. 6.5 km) in horizontal and 72 vertical levels, with closed lateral boundaries, only 7  
352 major rivers and implementing a weekly 3D-VAR assimilation scheme (Dobricic et al., 2007) assimilating temperature and  
353 salinity vertical profiles, Sea Level Anomaly (SLA) along with track altimeter data, moreover a non-solar heat flux correction  
354 was imposed through a nudging along the whole day with Sea Surface Temperature (SST) satellite gridded data.

355 A major upgrade of the PHY component was achieved in 2009 by implementing a version of the numerical model NEMOv3.1  
356 including LOBC in the Atlantic Ocean (Oddo et al., 2009) and moving to a daily assimilation cycle. The first exchanges with  
357 a wave model were implemented in 2010 when the PHY component was coupled hourly with WAM receiving the surface drag  
358 coefficient to better represent the wind stress. In 2013 the whole operational modelling system was updated by implementing  
359 an upgraded 2-way on-line coupled system based on NEMOv3.4 and WW3 (Clementi et al., 2017a) allowing for a more  
360 consistent exchange between the two models. The following year the PHY general circulation module was improved by

361 accounting for the effect of atmospheric pressure effect (in addition to wind and buoyancy fluxes) and an explicit linear free  
362 surface formulation using a time splitting scheme (Oddo et al., 2014), while the assimilation scheme was enhanced thanks to  
363 the assimilation of Tailored Altimetry Products for Assimilation Systems (TAPAS) SLA data allowing for the application of  
364 specific corrections of the altimetric original signal (Dobricic et al., 2012).

365 The PHY component delivered in 2015 included the nesting in the Atlantic Ocean through daily analysis and forecast fields  
366 from the global system, while one year later the assimilation scheme was enhanced including the computation of monthly and  
367 grid point EOFs and vertical observational errors varying with depth.

368 Another major PHY component evolution was achieved in 2017 when the resolution of the operational system was increased  
369 to  $1/24^\circ$  degrees (approx. 4 km) horizontal and 141 vertical levels using the z-star vertical coordinate system, a non-linear free  
370 surface formulation and the NEMOV3.6 version and 39 rivers were introduced. From year 2019 the Dardanelles Strait inflow  
371 was set as a lateral open boundary condition (instead as a river runoff climatological input) allowing for a daily update of the  
372 fluxes, and an improved nudging with the satellite sea surface temperature was included by correcting the heat fluxes only  
373 close to midnight.

374 The WAV component was developed and released for the first time in 2017 based on WAM Cycle 4.5.4 providing on a daily  
375 basis 5 days wave forecasts and simulations for the Mediterranean Sea at  $1/24^\circ$  horizontal resolution (Ravdas et al., 2018)  
376 nested within a North Atlantic model at  $1/6^\circ$  resolution and forced with ECMWF 10 m winds and PHY component surface  
377 currents. In March 2018 the system was upgraded by incorporating the data assimilation component to utilise available track  
378 SWH satellite observations from Sentinel-3A and Jason-3. In 2019, the wave model was upgraded to Cycle 4.6.2 and the  
379 duration of the forecasts were extended to 10 days. Additionally, a limitation to the high frequency part of the wave spectrum  
380 was applied while modifications from default values were introduced in the input source and dissipation functions: ZALP was  
381 set to 0.011 and  $C_{Ds}$  and  $\delta$  became 1.33 and 0.5 respectively.

382 In 2009, the first pre-operational version of the BIO component featured early versions of OGSTM transport model and BFM  
383 model (Lazzari et al., 2010). The spatial resolution was  $1/8^\circ$ , which required a subsampling of the PHY component fields from  
384 the  $1/16^\circ$  resolution. The Atlantic boundary was closed with a nudging term for nutrients and the land nutrients input included  
385 the three major Mediterranean rivers (i.e., Po, Rhone and Nile) and the Dardanelles was treated as a river. BFM used constant  
386 daily averaged irradiance to force photosynthesis (Lazzari et al., 2010).

387 Horizontal resolution aligned with the physical model in 2013 and was refined to  $1/24^\circ$  in 2017. Full alignment between the  
388 PHY and BIO components in terms of same horizontal and vertical resolutions, bathymetry, boundaries (number and position  
389 of rivers) was introduced in 2018 and remained a standard that mitigates possible approximation errors related to the use of  
390 daily output of the eddy-resolving ocean general circulation model to force the transport of tracers (Salon et al., 2019).  
391 Additionally, nutrient and carbon land input from 39 rivers were introduced in 2017, open boundary conditions at Dardanelles  
392 Strait in 2019 and in the Atlantic Ocean in 2020 (Salon et al., 2019).

393 Since 2008, three major improvements of the BFM model have been integrated (i) the addition of the carbonate system to  
394 predict alkalinity, ocean acidity and CO<sub>2</sub> air-sea exchanges in 2016 (Cossarini et al., 2015), (ii) the revision of nutrient  
395 formulation of phytoplankton in 2018 (Lazzari et al., 2016) and, (iii) in 2020, the introduction of the day-night cycle in light-  
396 dependent formulation of phytoplankton (Salon et al., 2019) and of the novel light extinction coefficient (Terzic et al., 2021).  
397 A major system evolution and quality improvement was achieved in 2013 with the inclusion of the assimilation of satellite  
398 chlorophyll through a variational scheme with prescribed background error covariance (Teruzzi et al., 2014). Assimilation  
399 method was improved in 2018 to include coastal component (i.e., non-uniform and direction-dependent horizontal covariance;  
400 Teruzzi et al., 2018) and in 2019 to integrate new observations (i.e., BGC-Argo float profiles) including new parameterization  
401 for the vertical and biogeochemical background error covariance (Cossarini et al., 2019).

402 In terms of operational product delivery, the BIO component has produced daily 10-day forecasts and weekly 7-day analysis  
403 since 2020, fully aligned with the PHY component (Salon et al., 2019). Before that, the system produced 7-day analysis and a  
404 7-day forecast once per week since 2013, while a second cycle of 7-day forecasts was added each week in 2015.

### 405 **3. Quality assessment**

406 The evaluation of the quality of the Med-MFC is given here only for the analysis products, leaving the assessment of the  
407 forecast skill for future work. One overarching driver for the Med-MFC evolution is the continuous improvement of the  
408 numerical model and data assimilation modules with respect to a well-defined set of goodness indices established for all the  
409 European regional Seas (Hernandez et al., 2009). Ocean model uncertainties emerge from sources of errors relevant to the  
410 ocean state, including physics, biogeochemistry, and sea ice, as well as errors in the initial state and boundary conditions (i.e.  
411 atmospheric forcing and lateral open boundary conditions). Model uncertainties in ocean physics have a significant impact in  
412 all other system components as, for example, in biogeochemistry and sea ice (Alvarez Fanjul et al., 2022). Our results describe  
413 the quality of the Med-MFC products presenting the statistics and accuracy numbers based on a reference simulation produced  
414 to calibrate and validate the operational forecasting systems, whereas the analysis of model uncertainty sources is outlined in  
415 the discussion part also referring to previous specific publications.

#### 416 **3.1. PHY component skill**

417 The skill of the physical component is assessed over a 3-year period from 2018 to 2020 (Clementi et al., 2019). The evaluation  
418 is done by means of Estimated Accuracy Numbers (EANs) which consist of the root mean square differences (RMSD) and  
419 bias (model minus observations) of daily mean of model outputs against satellite and in-situ observations. EANs are evaluated  
420 using daily mean of model estimates interpolated on the available observations in that day: this goodness score is somewhat  
421 approximated especially at the surface where daily variability is large, but this is a score used by many forecasting systems  
422 (Ciliberti et al., 2022; Toledano et al., 2022; Sotillo et al., 2021; Najy et al., 2020) and we will show it for reference purposes.  
423 We also use misfits, which are the difference between the model solutions and the observations at the observational time during

424 the forward model integration, for this assessment. The misfits provide quasi-independent and more accurate skill assessment  
425 since they are calculated before the variational analysis and at the observational time. ~~In EAN, the daily mean analyses are  
426 interpolated on daily available observations: this goodness score is somewhat approximated especially at the surface where  
427 daily variability is large, but this is a score used by many forecasting systems and we will show it for reference purposes.~~

428 Table 2 summarises the EAN of 3D model temperature and salinity daily mean values compared to in-situ observations, in  
429 particular Argo floats and CTD profiles averaged over the three reference years. Model temperature shows small positive and  
430 negative biases depending on the depth, with the largest error (maximum value of the period is 0.85°C) in the sub-surface  
431 layers between 10 and 60 m, decreasing with depth. Salinity is characterised by an almost general negative small bias, meaning  
432 generally lower salinities than measured, along the whole water column except for the first layer. The salinity RMSD mean  
433 value is generally lower than 0.2 PSU, the error is larger in the first layers and decreases significantly below 150 m. The  
434 comparison with other Copernicus Marine Service forecasting systems EAN values presented in the Quality Information  
435 Document (QUID), considering that the validation periods are different, shows that the Mediterranean temperature and salinity  
436 quality in terms of RMSD are aligned with all the other Copernicus forecasting systems. In particular the sea surface  
437 temperature averaged RMSD with respect to satellite data ranges from 0.48°C in the North West Shelf (derived from the QUID  
438 of the product NORTHWESTSHELF\_ANALYSIS\_FORECAST\_PHY\_004\_013 <https://doi.org/10.48670/moi-00054>) to  
439 0.8°C in the Baltic Sea (derived from the QUID of the product BALTICSEA\_ANALYSISFORECAST\_PHY\_003\_006  
440 <https://doi.org/10.48670/moi-00010>), while the 3D mean temperature RMSD with respect to in-situ data ranges from 0.4°C in  
441 the Mediterranean and North West Shelf to 0.7°C in the Black Sea (derived from the QUID of the product BLKSEA  
442 ANALYSISFORECAST\_PHY\_007\_001 [https://doi.org/10.25423/cmcc/blksea\\_analysisforecast\\_phy\\_007\\_001\\_eas4](https://doi.org/10.25423/cmcc/blksea_analysisforecast_phy_007_001_eas4)) and the  
443 salinity mean RMSD varies from 0.1 PSU in the Mediterranean and North West Shelf to 0.3 PSU in the Iberia-Biscay-Ireland  
444 area (derived from the QUID of the product IBI\_ANALYSISFORECAST\_PHY\_005\_001 [https://doi.org/10.48670/moi-  
445 00027](https://doi.org/10.48670/moi-00027)). The sea level anomaly skill is also aligned with the ones of other operational systems within the Copernicus Marine  
446 Service when compared with satellite altimeter observations (from 2.2 cm in the Black Sea to 9 cm in the North West Shelf  
447 area).

448 The other goodness index is computed as weekly mean root mean square error and bias using temperature and salinity misfits,  
449 that are computed at FGAT. The misfits are more precise to account for surface errors since the observations are compared  
450 with the model at the exact time of the day when observations are taken. This index is represented as a depth-time **Hovmoller**  
451 diagram in Figure 4. The temperature error is seasonal (Figure 4a), with maximum values of ~1.8 °C in the range of 30-60 m  
452 depth corresponding to the depth of the mixed layer and the seasonal thermocline during the stratified season, from June to  
453 November. The error is reduced to an average value of around 0.4 °C during the vertically mixed season from December to  
454 May. The temperature misfits (Figure 4c) indicate an overall overestimation of the temperature, except for the subsurface  
455 layers, during winter and spring.

456 The salinity error (Figure 4b) is defined by two main structures: one that is constant throughout the year down to about 150 m  
457 and the seasonal amplification during summer, as for the temperature errors. The maximum errors reach values of 0.35 **PSU**

458 in the summer period and decrease to 0.025 PSU below ~150 m. We argue that the background error, uniform throughout the  
459 year, could be due to inaccurate advection of salinity in different sub-areas of the Mediterranean Sea. Moreover, the model  
460 salinity bias is generally negative, i.e., the model salinity is lower than the observations (Figure 4d). This could be related to  
461 the larger Atlantic water inflow with respect to literature (Soto-Navaro et al., 2010) at Gibraltar as reported in Table 3 and to  
462 inaccurate mixing at Gibraltar due to the lack of tides.

463 Sea surface temperature (SST) and sea level anomaly (SLA) skills are evaluated comparing them with satellite observations:  
464 model daily mean SST is compared to SST satellite L4 gridded data at 1/16° resolution (Buongiorno Nardelli et al., 2018)  
465 while SLA is compared to along with track satellite altimeter observations (Taburet et al., 2019) in terms of model misfits.  
466 Table 4 presents the RMSD and bias values computed for SST as well as SLA RMSD averaged in the Mediterranean Sea and  
467 over the 16 sub-regions (see Figure 3). Considering SST, the RMSD values range between 0.47 °C and 0.69 °C (mean  
468 Mediterranean Sea error is 0.54 °C) and the bias is generally positive, possibly caused by an overestimation of the downward  
469 shortwave radiation flux which is estimated according to Reed (1977) formula, as already discussed in (Byun et al. (., 2007)  
470 and Pettenuzzo et al. (2010). The SLA error ranges between 2.3 cm and 5.3 cm (mean error is 3.8 cm). The SLA skill scores  
471 vary in different regions, this could be related to the spatial coverage of the observations (not homogeneous in the basin) and  
472 on the limit of the 1000 m assimilation depth (due to the dynamic height operator which assumes a level-of-no-motion to  
473 compute the sea level increments from temperature and salinity increments, see section 2.1.3).

474 The time variability of the model SLA accuracy is also provided by means of weekly model misfits evaluated for each available  
475 satellite altimeter and averaged in the whole Mediterranean Sea as shown in Figure 5. The error ranges between 2.5 cm and  
476 5.5 cm (maximum error with respect to Cryosat) with a large variability among the different satellites, with a generalised  
477 increase of error during Autumn and Winter seasons.

### 478 **3.2. WAV component skill**

479 The quality of the wave analysis and forecast product is assessed over a three-year period from January 2018 to December  
480 2020. The skill of the Mediterranean wave model is assessed by considering inter-comparisons of the model solution during  
481 the 24-h analysis phase with available in-situ (SWH and mean wave period from wave buoys) and remotely sensed (SWH)  
482 observations. As the latter are ingested into the model through data assimilation, the model first guess SWH (i.e. model  
483 background) is used instead of model analysis.

484 Significant wave height (SWH) and mean wave period (MWP) measurements are used for data validation from 28 wave buoys  
485 in the Mediterranean Sea (lower panel of Figure 7). Data quality control procedures have been applied to the in-situ  
486 observations (Copernicus Marine In-Situ Team, 2020) and measurements associated with a bad quality flag are not taken into  
487 consideration.

488 Figure 6 depicts scatter plots of the evaluation of the observed SWH and MWP against measurements obtained from the 28  
489 buoys. For the immense number of match-up data (within the range 0 – 1.25 m), the model overestimates SWH with respect  
490 to the buoy measurements (left-hand side panel). Additionally, the model underestimates SWH during more energetic events

491 (>1.25 m), except for the range 5.5-6.2 m. For large wave heights, model results underestimate SWH compared to the buoys,  
492 which agrees with past findings for the Mediterranean Sea (Ardhuin et al., 2007; Korres et al., 2011). Negative SWH BIAS  
493 can be attributed to errors in the forcing or inaccurate wave growth and dissipation at high wind speeds (Pineau-Guillou et al.,  
494 2018). The dashed orange line (i.e. the 45° ref. line) in the Quantile-Quantile (QQ) plot stands for the unit gradient line. We  
495 observe that model results follow the dashed orange line very closely, meaning the model produces well the distribution of  
496 SWH observations. Although for higher waves (> 1.25 m) the model tends to underestimate SWH (except for the range 5.5-  
497 6.2 m), it overproduces very large wave heights (100th, 99.97th, 99.96th, 99.95th percentiles); hence a deviation from the  
498 orange dashed reference line in the QQ plot becomes prominent for very high waves. Concerning MWP, the model  
499 systematically underestimates it (right-hand side panel). Despite the overall modelled MWP underestimation (BIAS = -0.314  
500 s), the system tends to overestimate MWP for high percentiles/very long waves (hence we observe the deviation of the Q-Q  
501 plot from the unit gradient line for very high periods). Seasonal results (not shown) for both variables SWH and MWP indicated  
502 that the model adequately captures the seasonal variability. For SWH, RMSD values vary from 0.154 m in summer to 0.231  
503 m in winter. Nevertheless,  $SI$  is higher in summer (0.26) than during the other seasons. Additionally, the highest Pearson  
504 correlation coefficient (CORR) is observed in winter (0.963, while the lower one is equal to 0.932 and it is observed in  
505 summer). The metrics reveal that the model follows better the observations in winter than during the other months since the  
506 former is associated with more well-defined weather patterns and higher waves. A similar conclusion has been reached also  
507 by other studies (e.g. Ardhuin et al., 2007) for the Mediterranean Sea. Summer and autumn are characterised by higher SI  
508 values (0.244 and 0.260 respectively), while lower values are obtained for winter and spring (0.231 and 0.227 respectively).  
509 Finally, small positive BIAS values are met for all seasons, with the highest values found in summer (0.012 m). Regarding  
510 mean wave period, RMSD varies from 0.610 s in summer to 0.66 s in winter and BIAS is negative for all seasons. SI does not  
511 present significant seasonal variability, with the highest value encountered in summer. Finally, CORR for MWP is higher than  
512 0.8 in all seasons (values are within the range 0.859 – 0.878, while during summer CORR equals 0.792). These metrics  
513 demonstrate that the model wave period (similarly to the wave height) correctly follows the observations in well-defined  
514 weather conditions characterised by higher waves and longer periods, agreeing with past studies (Cavaleri and Sclavo, 2006;  
515 Ravdas et al., 2018).

516 The qualification metrics for the different buoy locations in Figure 6 are plotted in Figure 7 (upper panel). RMSD at the  
517 different buoy locations varies from 0.13 m to 0.31 m. ~~Scatter Index (SI)~~ varies from 0.17 at buoy 3732621 to 0.35 at the buoys  
518 of Malaga and SARON (Aegean Sea). In general, SI values above the mean value for the whole Mediterranean Sea (0.24) are  
519 obtained at wave buoys located near the coast, particularly if these are sheltered by land masses on their north-northwest (e.g.  
520 western French coastline), and/or within enclosed basins characterised by a complex topography such as the Aegean Sea. As  
521 explained in several studies (Ravdas et al., 2018), in these cases, the spatial resolution of the wave model is often not adequate  
522 to resolve the fine bathymetric features whilst the spatial resolution of the forcing wind forcing is incapable to reproduce the  
523 fine orographic effects, introducing errors to the wave analysis. The Pearson correlation coefficient (CORR) mostly follows  
524 the pattern of variation of SI (in this figure we present the CORR deviation from unity). CORR ranges from 0.87 at SARON



525 in the Aegean Sea to 0.97 at the deep-water buoy 6100196 offshore Spain, which is well-exposed to the prevailing north-  
526 westerly winds in the region. The BIAS varies from -0.13 m at buoy 3732621 (located north of Crete) to 0.13 m at buoy  
527 6100021 located near the French coast. Its sign varies, with positive and negative values computed at almost the same number  
528 of locations respectively. Figure 8 (right) shows the scatter plot between the first guess SWH and satellite observations. Here  
529 the initial guess SWH refers to the model SWH before data assimilation, thus meaning semi-independent model data. In  
530 addition, a scatter plot resulting from the comparison of the ECMWF forcing wind speeds (U10) and satellite measurements  
531 of U10 is shown in Figure 8 (left). It is seen that ECMWF forcing overestimates U10 with respect to observations, throughout  
532 most of U10 range while some underestimation is observed for high wind speeds (14 – 19 m/s). An overall ECMWF  
533 overestimation of 3% is computed. On the other hand, the SWH model underestimation is about 6%. Compared to the  
534 equivalent results obtained from the model-buoy comparison, a smaller scatter (by about 7%) with a larger overall bias is  
535 associated with the model-satellite comparison, i.e. open ocean waves. SI values compare well at the more exposed wave  
536 buoys in the Mediterranean Sea.

537 Figure 9 maps statistics of the comparison of model first-guess and satellite observations of SWH for the different sub-regions  
538 of the Mediterranean Sea. The Aegean and Alboran Seas have relatively high SI values (0.21). The highest value of SI is  
539 obtained for the North Adriatic Sea (0.26) followed by the South Adriatic (0.23). The lowest values (0.13-0.15) are found in  
540 the Levantine Basin, the Ionian Sea, and the Southwest Mediterranean Sea. Relatively low values (0.16) are also found west  
541 of the islands of Sardinia and Corsica. As discussed above, the error is due to inaccuracies associated with orographic winds  
542 and/or local sea breezes and the missing representation of the complicated bathymetry in the fetch-limited, enclosed regions.  
543 SWH negative bias is present in all sub-regions.

544 Finally, inter-compared to ECMWF, UK MetOffice and DMI (Danish Meteorological Institute) wave forecasting systems for  
545 a different year (2014), Med-waves shows a better skill in terms of SWH with RMS errors for the Western Med buoys equal  
546 to 0.227 m (0.234 m for ECMWF; 0.281 m for UK MetOffice) and 0.201 m for the central and eastern Mediterranean (0.227  
547 m for ECMWF; 0.268 m for DMI).

548

### 549 **3.3. BIO component skill**

550 The BIO component state variables can be validated at three different uncertainty levels providing a “degree of confirmation”  
551 (Oreskes et al., 1994) of different scales of variability based on the availability of reference data.

552 Near real time satellite and BGC-Argo float data provide a rigorous skill performance validation data set down to the scales of  
553 the week and mesoscale dynamics for a limited set of variables: chlorophyll, nitrate and oxygen. Dataset of historical  
554 oceanographic data (SoCAT dataset, Baker et al (2016); EMODnet data collection, Buga et al. (2018); Cossarini et al., (2017);  
555 Lazzari et al., 2016) are used to build a reference framework of sub-regions and annual and seasonal climatological profiles to  
556 validate model performance to simulate the basin wide gradients, the mean vertical profiles and the seasonal cycle. For this

557 data set it is possible to have nutrients, such as nitrate, phosphate, ammonia and silicate, as well as dissolved oxygen, dissolved  
558 inorganic carbon, alkalinity and surface pCO<sub>2</sub>.

559 Lastly, a third level of validation regards those variables whose observability level is very scarce (e.g., phytoplankton biomass)  
560 or based on indirect estimations (e.g., primary production, air-sea CO<sub>2</sub> fluxes). Only confirmation of the range of variability  
561 and a general uncertainty estimation can be provided for those variables (see for example the validation of model primary  
562 production in (von Schuckmann et al., 2020; Cossarini et al., 2020).

563 Considering the 2018-2020 reference period, the chlorophyll is very well reproduced by the BIO component, both in terms of  
564 seasonal cycle and spatial gradient at surface (Figure 10) and in terms of vertical profiles at the BGC-Argo float positions  
565 (Table 5). Uncertainty of surface chlorophyll is lower than 0.03 mg/m<sup>3</sup> with larger values registered in winter and western sub-  
566 regions where the variability and the chlorophyll values are higher (Figure 10a and b). Regarding profiles, chlorophyll values  
567 and vertical shapes driven by mesoscale dynamics are simulated with a high level of accuracy by the model (Salon et al., 2019;  
568 Cossarini et al., 2019, 2021). Daily values of RMSD and of Pearson correlation are computed between satellite and model  
569 output maps, then averaged over the two periods (Figure 10c and d). The plot of RMSD (Figure 10c) shows that higher errors  
570 are registered in the western sub-regions and in winter when chlorophyll levels and variability are higher. On the other hand,  
571 spatial correlation values are moderate and high in all sub-regions (i.e., values always above 0.5 except for a few sub-regions),  
572 with summer values better than winter values. Considering the number of grid points in each sub-regions, all values in Figure  
573 10d should be considered significantly non-zero at the 0.05 level. Indeed, Salon et al. (2019) show how, using novel metrics,  
574 the BIO component reproduces with high level of accuracy not only the concentrations in the euphotic layer, but also the  
575 seasonal evolution of the shape of the profiles. The depth of the deep chlorophyll maximum during summer and of the surface  
576 bloom during winter, as well as the depth of the nitracline and the depth of the maximum oxygen layer, which results from the  
577 interaction of physical and biogeochemical processes, are reproduced with an uncertainty of the  $O(10^1)$  meters (Table 5).  
578 However, the conclusions about mesoscale accuracy of the BIO component should be taken with caution since the BGC-Argo  
579 observations are still relatively few in number (about 1 over 8 w.r.t. the Argo floats have biochemical sensors) and unevenly  
580 spaced (e.g., southern Mediterranean Sea is less observed than northern areas).

581 As explained above, an additional verification of biogeochemical variables can be achieved for additionally 7 variables (not  
582 considering chlorophyll) and two other derived variables with climatological data. An example of such comparison is shown  
583 in Figure 11 for the carbonate system variables. Average maps and profiles of Alkalinity and DIC in selected sub-regions in  
584 the zonal directions (coloured lines) are well superimposed to the range of variability of the historical in-situ data (grey shaded  
585 areas) demonstrating the capability of the BIO component to reproduce both horizontal basin-wide gradients and vertical  
586 profiles in the different areas. A slight overestimation of DIC and alkalinity (underestimation of alkalinity) is simulated in the  
587 Alboran sub-region in the upper 0-100 layer.

588 As a summary of the skill performance analysis, statistics based on RMSD for all the considered model variables (Table 6)  
589 reports the model uncertainty in reproducing the basin-wide values and gradients for the selected layers. Generally, larger  
590 errors are computed for the upper layers where the variability (both spatial and temporal) is higher. Ammonia reports high

591 errors also in subsurface layers, which is due to a possible incorrect initialization of deep layers since the lack of data in 9 out  
592 of 16 sub-regions. These numbers, which respond to the request for a synthetic measurement of Copernicus Marine Service  
593 product accuracy (Hernandez et al., 2018), are consolidated by in deep skill performance analysis of BFM model in reproducing  
594 chlorophyll (Lazzari et al., 2012; Teruzzi et al., 2018), nutrients (Lazzari et al., 2016; Salon et al., 2019) and carbonate system  
595 variables (Cossarini et al., 2015).

596 Chlorophyll from Ocean Color is the most common variable used for validation and near real time assessment of operational  
597 biogeochemical models and allows for a comparison of the forecast skill performance among the Marine Copernicus systems.  
598 Results of surface chlorophyll skill scores show that the quality of the first day of forecast of the BIO component is in line  
599 with those of other Copernicus models<sup>1</sup> (Spruch et al., 2020; Vandenbulcke et al., 2022; McEwan et al., 2021; McGovern et  
600 al., 2020). In particular, the two proposed accuracy indexes (i.e., one minus scatter index and one minus the root mean square  
601 error normalised on variability) of the MED model equal to 34% and 47%, which are within the ranges of the other Copernicus  
602 systems: 11%-38% and 13%-73% for the two skill scores, respectively (Spruch et al., 2020; Vandenbulcke et al., 2022;  
603 McEwan et al., 2021; McGovern et al., 2020).

604 For other biogeochemical variables, a direct comparison of the accuracy among Copernicus models is not straightforward,  
605 given the different protocols for metrics computation, the representativeness of the available observations and the large range  
606 of variability of observed values of biogeochemical variables among the European seas. Nevertheless, a rough comparative  
607 assessment of the quality of Marine Copernicus biogeochemical models can be provided using published estimated EANs  
608 normalized by the typical values of the variables (McEwan et al., 2021; Feudale et al., 2021; Spruch et al., 2020; Melsom and  
609 Yumruktepe, 2021; McGovern et al., 2020; Vandenbulcke et al., 2021) to derive a common index of relative uncertainty. As  
610 for examples, relative uncertainty of oxygen of the MED system is of the order of 2% which is in line with the other Copernicus  
611 systems, except for Baltic and Black Seas systems, which show slightly higher relative errors. For nutrients, nitrate and  
612 phosphate uncertainties of the MED are about 50% and 35% which are similar or slightly better than most of the other  
613 Copernicus marine biogeochemical systems (i.e., ranges of 30-75% and 30-50% for nitrate and phosphate, respectively).  
614 Finally, the relative uncertainty of pH simulated by the MED system is less than 0.5% while other Copernicus systems report  
615 relative errors of the order of 1-2%.

616 Beside the aforementioned comparison, ~~it is worth to report that~~ the MED biogeochemical system exhibits some  
617 distinguishable features: the continuous monitoring of the forecast skill of surface chlorophyll since the beginning of the  
618 operational biogeochemical system dating back to 2010 (Salon et al., 2019), a large number of validated variables with in-situ  
619 data (i.e., up to 10 variables, Table 6), the thorough use of BGC-Argo observations for near real time forecast validation (Salon  
620 et al., 2019; Cossarini et al., 2021; <https://medeaf.ogs.it/nrt-validation>, last visit August 2022).

---

<sup>1</sup> Product Quality Dashboard, Green Ocean section, <https://pqd.mercator-ocean.fr/>, accessed 15 July 2022.

### 621 3.4. ECMWF forcing skill

622 A calibration/validation system of the ECMWF forcing fields used by the Med-MFC operational systems has been developed  
623 using in-situ ground meteorological observations (METAR stations) and numerical model data from ECMWF (see Figure 12).  
624 Four well-established statistical indices for validating 2 m temperature, dew point temperature, air pressure and wind speed  
625 have been defined: (a) Bias, (b) RMS Error, (c) Nash-Sutcliffe Model Efficiency Coefficient, (d) Correlation Coefficient.  
626 The atmospheric forcing Cal/Val system will become publicly available and an example of this validation is provided in figure  
627 12 showing daily mean wind speed time series from a METAR station (blue line) and ECMWF (red line) in the area of the  
628 Gulf of Lion during the year 2019 as well as time series of main skill metrics.

### 629 4. Conclusions and Future Perspectives

630 In this paper, the Med-MFC components (PHY, BIO and WAV) have been described providing an overview of their technical  
631 specifications. The PHY component provides 3D currents, temperature, salinity with the BIO and WAV components daily,  
632 with daily mean values. This approximation is flexible enough that improvements can be carried out separately on the three  
633 components, considering different levels of maturity of the numerical modelling parametrizations, the data assimilation  
634 components and the validation data sets. A different data assimilation system is run for each component making the best use  
635 of all available data from satellite and in-situ observations, the effort is to assimilate as much data as possible and use  
636 background or model uncertainties to account for the missing couplings. The 3 components accuracy has been evaluated for a  
637 common three-year period, from January 2018 to December 2020.

638 The PHY component has been validated comparing model data with respect to in-situ and satellite observations showing a  
639 good accuracy in representing the spatial pattern and the temporal variability of the temperature, salinity and sea level in the  
640 Mediterranean Sea. In particular, the model has a warm surface temperature bias of +0.12 °C when compared to satellite SST.  
641 The ~~temperature error along the water column~~ has a clear seasonal signal with the largest errors at the depth of the surface  
642 mixed layer and the seasonal thermocline. The model error in salinity is higher in the first layers and decreases significantly  
643 below 150 m. The SLA presents a mean average error of 3.8 cm on the three-year averaged period for the whole basin.

644 The WAV component was extensively validated for the 3-year period using all available in-situ and satellite observations in  
645 the Mediterranean Sea. All statistical values calculated and presented here showed a very good system performance. It is  
646 concluded that the Mediterranean SWH is accurately simulated by the WAV component. The typical SWH difference with  
647 observations (RMSE) over the whole basin is 0.21 m (0.197 m for in-situ and 0.228 m for satellite observations) with a bias  
648 ranging from -0.137 m to -0.005 m, when the comparison is against the in-situ observations, and from to -0.088 m to 0.131  
649 m when the comparison is with satellites. The scatter index (SI) exhibits low values (13%-17%) over the majority of the basin  
650 and relatively higher values (18%-21%) over the Aegean, Alboran, Ligurian and East Levantine Sea, with the highest SI value  
651 encountered in the North Adriatic Sea (26%). As explained, the occurrence of higher SI values is mainly related to the quality

652 of ECMWF winds in fetch-limited areas of the basin where the orographic effects play an important role and the difficulties  
653 of wave models to appropriately resolve complicated bathymetry and coastline.

654 Overall, the quality of the WAV component stems from the ECMWF wind forcing that drives the wave dynamics, data  
655 assimilation, forcing from Med-PHY surface currents and improved parameterization of wave wind source and dissipation  
656 terms of WAM model. In particular, the WAV component assimilates satellite altimetry data with a well calibrated stand-alone  
657 OI scheme and implements regular updates and improved parameterization independently from the other components. Given  
658 that wind forcing quality has a substantial influence on the model response, a considerable part of the wave product uncertainty,  
659 especially under high winds or extreme conditions, is related to the wind forcing uncertainty and can be substantially improved  
660 by undertaking the ensemble approach in wave forecasting. The lower accuracy of the wave product in semi-enclosed regions  
661 of the Mediterranean Sea (e.g. Adriatic and Aegean Seas) can be related to the current spatiotemporal resolution of the wind  
662 forcing. Near the coast, unresolved topography by the wind and wave models and fetch limitations causes the wave model  
663 performance to deteriorate. In particular, the WAV component assimilates satellite altimetry data with a well calibrated stand-  
664 alone OI scheme and implements regular updates and improved parameterization independently from the other components.  
665 Given that wind forcing quality has a substantial influence on the model response, a considerable part of the wave product  
666 uncertainty, especially under high winds or extreme conditions, is related to the wind forcing uncertainty and can be  
667 substantially improved by undertaking the ensemble approach in wave forecasting. The lower accuracy of the wave product  
668 in semi-enclosed regions of the Mediterranean Sea (e.g. Adriatic and Aegean Seas) can be related to the current spatiotemporal  
669 resolution of the wind forcing. Near the coast, unresolved topography by the wind and wave models and fetch limitations cause  
670 the wave model performance to deteriorate.

671 The BIO system has defined a validation framework (Salon et al., 2019) based on multivariate (e.g., more than 10 variables)  
672 and multilevel metrics that include GODAE class 1 and class 4 statistics and process- oriented metrics. Particularly interesting,  
673 the present validation framework includes also near real time observations (i.e. satellite and BGC-Argo) that ~~shows~~ show  
674 average errors in the 0-200 m layer of 0.04 mg/m<sup>3</sup>, 0.4 mmol/m<sup>3</sup> and 16.8 mmol/m<sup>3</sup> for chlorophyll, nitrate and oxygen,  
675 respectively. Thus, the validation framework represents a robust benchmark for the future improvements of the Mediterranean  
676 BIO model. Indeed, as detailed in Salon et al. (2019) and Cossarini et al. (2021), critical sources of the BIO model errors  
677 include unresolved Atlantic boundary conditions as well as land-sea and atmospheric-sea forcing uncertainty in model  
678 parameterization and inconsistency of coupled physical-biogeochemical processes.

679 The value and reliability of the Med-MFC systems is demonstrated by the several downscaling coastal model systems and  
680 downstream applications that use its outputs operationally. The CYCOFOS – Cyprus Coastal Ocean Forecasting and Observing  
681 System (Zodiatis et al., 2003), which is a sub-regional forecasting and observing system in the Eastern Mediterranean  
682 Levantine Basin, uses the Med-MFC output to set its boundary conditions. The Med-MFC outputs are used ~~as for~~ initial and  
683 lateral boundary conditions by the physical and wave ocean system MITO, which provides 5-day forecasts at resolution up to  
684 1/48° (Napolitano et al., 2022). The Southern Adriatic Northern Ionian coastal Forecasting System (SANIFS), which is a  
685 coastal-ocean operational system providing short-term forecasts since September 2014 (Federico et al., 2017). It is built on the

686 unstructured-grid finite-element three-dimensional hydrodynamic SHYFEM model and is based on a downscaling approach  
687 starting from the large-scale system Med-MFC which provides the open-sea fields.

688 The CADEAU physical-biogeochemical forecast system of the Northern Adriatic Sea (Bruschi et al., 2021) is based on a high  
689 resolution (up to 700 m~~700m~~) application of the MITgcm-BFM model (Cossarini et al., 2017) targeting water quality and  
690 eutrophication and uses the daily Med-MFC products for initialization and to constrain the southern boundary.

691 In addition, the GUTTA-VISIR system, which can be defined as a tactical, global-optimization, single-objective, deterministic  
692 model system for ship route planning (Mannarini et al., 2015 and 2016; Mannarini and Carelli, 2019), uses the analysis and  
693 forecast wave and current fields from the Med-MFC in conjunction with wind fields from ECMWF.

694 Since 2008 the Med-MFC components have been continuously upgraded and substantially improved. The system evolution  
695 will continue also in the future following the main drivers of the three components: the Copernicus Marine Service users.  
696 Considering the PHY system, the users need finer spatial scales and higher time frequencies of the products especially for  
697 improving the representation of the coastal scale and limited area processes in nested models, thus providing a unique  
698 opportunity to model the coastal areas at the resolution of few hundred meters using nesting schemes as demonstrated in  
699 Federico et al. (2017) and Trotta et al. (2021) ~~among the others~~. Users also require higher accuracy in storm surge forecasting,  
700 which can be achieved by including the explicit representation of the tidal forcing to resolve non-linear interactions between  
701 astronomical and internal tides with the baroclinic circulation. An upgrade of lateral open boundary conditions in the Atlantic  
702 and the Black Sea would provide better evaluation of the transport at Gibraltar ~~on one side~~, and improved dynamics in the  
703 north Aegean Sea ~~on the other~~. Higher frequency river runoff data from hydrological models, as well as more accurate salinity  
704 values at river mouths, would provide better salinity skill not only along the coastal areas but in the whole basin. Another  
705 important goal for the future is to assimilate Argo and drifter trajectories (Nelson et al., 2016) and gliders (Dobricic et al.,  
706 2009) data as well as sea level anomaly in coastal areas. Finally, ~~the future~~ should consider ensemble forecasting to recast the  
707 deterministic forecast within a probabilistic framework assessing the modelling uncertainties (Pinardi et al., 2011; Millif et al.,  
708 2009; Thoppil et al., 2021; Barton et al., 2021). ~~Another important goal for the future is to assimilate Argo and drifter  
709 trajectories (Nelson et al., 2016) and gliders (Dobrici et al., 2009), as well as sea level anomaly in coastal areas.~~

710 User needs for the future evolution of the WAV component indicate the increase of the frequency of the wave analyses, making  
711 available larger data sets such as the wave spectra and dedicated products (like the directional spread at peak frequency and  
712 different parts of the wave spectrum). The required increased accuracy in wave height and mean periods predictions can be  
713 mainly achieved by improving the quality of the wind forcing which is the main driving force of wave models. Bias correction  
714 of ECMWF winds and further downscaling of ECMWF forecasts is expected to improve winds and consequently wave product  
715 quality especially in semi-enclosed areas (e.g. Adriatic, Aegean) and near the coast. Assimilation upgrades with the ingestion  
716 of multi-mission significant wave heights at 5Hz and in-situ wave heights measurements from HF Radars will improve  
717 accuracy in coastal areas of the Mediterranean Sea while the inclusion of spectral information in the near future (e.g. CFOSAT  
718 wave spectrum) will further improve the prediction of the sea state. Finally the development of a WAV ensemble prediction

719 based on ECMWF operational ensemble winds is expected to improve the existing accuracy of the deterministic forecast at  
720 lead times beyond 48 hours providing in parallel uncertainty estimates of wave parameters.

721 User requirements for the BIO component developments include improved quality and products tailored for ecosystem and  
722 coastal applications. The validation results have contributed to identify ameliorable model process representations and model  
723 parameter estimates that can be improved. These include better representation of vertical nutrient and plankton dynamics, a  
724 greater number of phytoplankton functional types and zooplankton compartments to describe the diversity of the plankton  
725 community and the different energy and matter pathways in the ecosystem. In addition, the integration of optics and  
726 biogeochemistry, including novel hyperspectral and high-resolution radiometric data, can be used to better represent  
727 photosynthesis and light-related processes and to calibrate parameters of important ecosystem processes (Lazzari et al., 2021).  
728 Assimilation of new in-situ profile sensors and variables (e.g., BGC-Argo Float and Glider) will help increase the reliability  
729 of BIO products, especially along the water column (Cossarini et al., 2019). Higher quality vertical dynamics can be achieved  
730 through better representation of vertical model error covariances by ensemble (Carrassi et al., 2018) or joint physical-  
731 biogeochemical data assimilation techniques. Finally, revising nutrient and carbon inputs from rivers (e.g., from monthly  
732 climatologies to daily observations or model predictions) will allow better resolution of coastal dynamics and coastal-offshore  
733 patterns in critical areas.

734

735

736 **Author Contributions:** G.C. (Coppini) and E.C. coordinated the preparation of the paper in collaboration with G.C. (Cossarini) and G.K.  
737 E.C., G.C. (Cossarini) G.K., P.L., A.T., G.B., J.P., A.C.G., A.A., R.E., A.C., D.D., S.M., A.N., N.P., M.R. contributed to the system and  
738 models development; V.L., A.G., L.F., C.A., V.D., A.M., A.C.G, A.Z., C.O., E.C. contributed to the model validation and assessment; R.L.,  
739 M.D., A.M., A.B., G.L.C., contributed to the operational activities. All authors contributed to the final version of the paper.

740 **Funding:** This work has been funded through the EU Copernicus Marine Med-MFC Service Contact n.74.

741 **Acknowledgments:** This study has been conducted using EU Copernicus Marine Service Information. Within the Copernicus Marine  
742 Service of the Med-MFC, CMCC is in charge of the coordination of the service and responsible for the Physics (ocean circulation) Production  
743 Unit, OGS is responsible for the BIO (biogeochemical) Production Unit and HCMR is responsible for the Wave Production Unit. The authors  
744 thank CINECA (Italian supercomputer centre) for the technical support provided in the biogeochemical component production workflow.

745 **Conflicts of Interest:** The authors declare no conflict of interest

746

747

748 **Appendix A**

749

750

Table A1. List of the NEMO and WW3 numerical setup for the PHY component.

751

| <b>Parameter</b>                | <b>Value</b>                                                                                       |
|---------------------------------|----------------------------------------------------------------------------------------------------|
| NEMO model version              | 3.6                                                                                                |
| Horiz. Resolution               | 1/24°                                                                                              |
| Vertical discretization         | 141 z levels with partial cells                                                                    |
| Vertical coordinates            | Z-star                                                                                             |
| Time-step                       | 240 s                                                                                              |
| Number of barotropic iterations | 100                                                                                                |
| Free-surface formulation        | Non-Linear free surface with split-explicit free surface                                           |
| Air-sea fluxes                  | MFS-Bulk formulae                                                                                  |
| Atmospheric Pressure            | Yes                                                                                                |
| Wave coupling                   | Neutral drag coefficient                                                                           |
| Runoff                          | Surface boundary condition<br>with specific treatment at river mouth and prescribed river salinity |
| Sea Surface Restoring T/S       | only for temperature                                                                               |
| Solar radiation penetration     | 2-band exponential penetration (insert the decay length and the transmission coeff)                |
| Lateral momentum B.C.           | No-slip                                                                                            |
| Lateral Open B.C.               | Flather open boundary condition for barotropic currents, Orlansky for total currents and tracers   |
| Bottom B.C                      | Non-linear friction with logarithmic formulation                                                   |
| Equation of State               | EOS-80                                                                                             |
| Tracer Advection                | Up-stream/MUSCL                                                                                    |



|                                       |                                                                                                                 |
|---------------------------------------|-----------------------------------------------------------------------------------------------------------------|
| Tracers Horiz. Diffusivity            | Bi-Laplacian coeff = $-1.2.e8$ [m <sup>4</sup> /s]                                                              |
| Momentum Horiz. Viscosity             | Bi-Laplacian coeff = $-2e.8$ [m <sup>4</sup> /s]                                                                |
| Momentum Advection                    | Vector form (energy and enstrophy cons. scheme)                                                                 |
| Turbulent vertical viscosity scheme   | Richardson number dependent formulation following Pacanowsky Philander (1981) and Lermousiaux (2001) adjustment |
| Background Vertical Visc.             | $1.2e-6$ [m <sup>2</sup> /s]                                                                                    |
| Background Vertical Diff.             | $1.0e-7$ [m <sup>2</sup> /s]                                                                                    |
| Vertical time stepping scheme         | Implicit                                                                                                        |
| WW3 model version                     | 3.14                                                                                                            |
| Horiz. Resolution                     | 1/24°                                                                                                           |
| Number of frequencies                 | 30                                                                                                              |
| Number of directions                  | 24                                                                                                              |
| Time-step (global)                    | 240 s                                                                                                           |
| Wind input term                       | Janssen's quasi-linear theory (Jansen, 1989; Jansen, 1991)                                                      |
| Wave dissipation term                 | Hasselmann (1974) according to Komen et al. (1984)                                                              |
| Non-linear wave-wave interaction term | Discrete Interaction Approximation (DIA, Hasselmann et al., 1985)                                               |
| Coupling with NEMO                    | Sea surface currents, sea surface temperature                                                                   |

752

753

754

**Table A2.** List of the WAM model set up for the WAV component.

| Parameter         | Value       |
|-------------------|-------------|
| WAM model version | Cycle 4.6.2 |
| Horiz. Resolution | 1/24°       |

|                           |                                                                                                                                  |
|---------------------------|----------------------------------------------------------------------------------------------------------------------------------|
| Geographical domain       | 18.125°W - 36.2917°E<br>30.1875°N - 45.9792°N.                                                                                   |
| Depth map                 | GEBCO 30arc-second                                                                                                               |
| Number of frequencies     | 32                                                                                                                               |
| Number of directions      | 24                                                                                                                               |
| Time-step (propagation)   | 60 s                                                                                                                             |
| Time-step (sources)       | 360 s                                                                                                                            |
| Deep/Shallow mode         | Shallow                                                                                                                          |
| 10 m winds                | ECMWF 10 m analyses and forecast winds                                                                                           |
| $C_{DS}$ , $\delta$       | 1.33, 0.5                                                                                                                        |
| ZALP                      | 0.011                                                                                                                            |
| Surface currents coupling | Offline coupled with Med-MFC NRT daily surface currents                                                                          |
| Data assimilation         | Optimal Interpolation method / Altimeter satellite data provided by Copernicus Marine Service are assimilated in the wave model. |

755

756

**Table A3.** List of the OGSTM-BFM model set up for the BIO component.

| <b>Parameter</b>                                                                 | <b>Value</b>                                                                        |
|----------------------------------------------------------------------------------|-------------------------------------------------------------------------------------|
| OGSTM model version                                                              | 4.1                                                                                 |
| BFM model version                                                                | 5.0                                                                                 |
| 3DVarBio version                                                                 | 3.3                                                                                 |
| Horiz. Resolution                                                                | 1/24o                                                                               |
| Geographical domain                                                              | 9.0°W - 36.2917°E 30.1875°N - 45.9792°N.                                            |
| OGSTM: physical forcing                                                          | U, V, W, eddy diffusivity, SSH                                                      |
| OGSTM: timestep                                                                  | 450 s                                                                               |
| OGSTM: off-line coupling frequency                                               | 1 d                                                                                 |
| OGSTM: advection scheme                                                          | Smolarkiewicz                                                                       |
| OGSTM: horizontal diffusion                                                      | Bi-Laplacian coefficient -3.e9 [m4/s]                                               |
| OGSTM: vertical diffusion scheme                                                 | implicit 2nd order                                                                  |
| BFM parameters for Phytoplankton, Zooplankton, Bacteria, DOM and POM formulation | as in (Lazzari et al., 2012) and 2016                                               |
| BFM light: type of model                                                         | instantaneous light from short wave radiation, light at the centre of the grid cell |
| BFM light: Fraction of Photosynthetically Available Radiation                    | 0.40                                                                                |
| BFM light: conversion W/m2 to moli quanta/m2/s                                   | 1./0.217 Watt / umol photons                                                        |
| BFM light: background extinction coeff.                                          | 0.0435 1/m                                                                          |
| BFM light: specific attenuation coefficient of particulate                       | 0.001 m2/mgC                                                                        |

|                                                                     |                                                                     |
|---------------------------------------------------------------------|---------------------------------------------------------------------|
| BFM carbonate system: solver using total alkalinity and DIC         | SolveSAPHE v1.0.1 routines (Munhoven, 2013)                         |
| BFM carbonate system: K0, solubility of co2 in the water (K Henry)  | Weiss 1974                                                          |
| BFM carbonate system: k1 and k2 constants for carbonic acid         | Mehrbach et al. (1973) refit, by Lueker et al. (2000) (total scale) |
| BFM carbonate system: Kb constant for boric acid                    | Millero p.669 (1995) using data from Dickson (1990) (total scale)   |
| BFM carbonate system: k1p, k2p and k3p constants of phosphoric acid | Millero (1974)                                                      |
| BFM carbonate system: Ksi constant of orthosilicic acid             | Millero (1995)                                                      |
| BFM carbonate system: Kw of water dissociation                      | Millero (1995)                                                      |
| BFM carbonate system: ks of sulfuric acid                           | Dickson (1990)                                                      |
| BFM carbonate system: kf of folic acid                              | Perez & Fraga (1987) recom. by Dickson et al., (2007)               |
| BFM carbonate system: air-sea exchange model                        | Wannikoff et al., 2014                                              |
| 3DVarBio: max depth of assimilation                                 | 200 m                                                               |
| 3DVarBio: n. of vertical EOFs                                       | 26                                                                  |
| 3DVarBio: horizontal correlation radius                             | variable in X and Y; average 15 km (Teruzzi et al., 2018)           |
| 3DVarBio: solver for cost function J                                | quasi-Newton L-BFGS minimizer                                       |
| 3DVarBio: Minimum gradient of J                                     | 1.0E-11                                                             |
| 3DVarBio: Percentage of initial gradient                            | 0.01                                                                |
| 3DVarBio: n. of interactions of recursive filter                    | 4                                                                   |

759  
760

761

762

763

764

**Table A.4.** River sources implemented as freshwater inputs in the physical and biogeochemical models, including river name, the annual mean runoff and the imposed salinity at river mouth.

765

766

| River Name           | Mean annual Runoff [m <sup>3</sup> /s] | Salinity at river mouth [psu] |
|----------------------|----------------------------------------|-------------------------------|
| Ebro                 | 432                                    | 30                            |
| Rhone                | 1707                                   | 25                            |
| Po                   | 1519                                   | 18                            |
| Buna-Bojana          | 675                                    | 15                            |
| Seman                | 201                                    | 15                            |
| Vjosa                | 183                                    | 15                            |
| Nile                 | 475                                    | 8                             |
| Aude                 | 59                                     | 15                            |
| Arno                 | 88                                     | 15                            |
| Tevere               | 181                                    | 15                            |
| Volturno             | 63                                     | 15                            |
| Medjerda             | 59                                     | 15                            |
| Reno                 | 67                                     | 15                            |
| Adige                | 232                                    | 15                            |
| Brenta               | 163                                    | 15                            |
| Piave                | 129                                    | 15                            |
| Livenza              | 96                                     | 15                            |
| Tagliamento          | 79                                     | 15                            |
| Isonzo               | 175                                    | 15                            |
| Lika                 | 84                                     | 15                            |
| Krka                 | 57                                     | 15                            |
| Neretva              | 239                                    | 15                            |
| Trebisnjica          | 93                                     | 15                            |
| Mati                 | 99                                     | 15                            |
| Shkumbini            | 54                                     | 15                            |
| Arachtos             | 75                                     | 15                            |
| Acheloos             | 106                                    | 15                            |
| Pineios              | 67                                     | 15                            |
| Axios                | 97                                     | 15                            |
| Struma               | 81                                     | 15                            |
| Maritza              | 166                                    | 15                            |
| Gediz                | 53                                     | 15                            |
| Buyuk Menderes       | 106                                    | 15                            |
| Köprüçay/Eurimedonte | 85                                     | 15                            |
| Manavgat             | 122                                    | 15                            |
| Goksu                | 203                                    | 15                            |
| Seyhan               | 200                                    | 15                            |
| Ceyhan               | 231                                    | 15                            |
| Orontes              | 94                                     | 15                            |

768 **References**

- 769 Adani, M., Dobricic, S., and Pinardi N.: Quality Assessment of a 1985–2007 Mediterranean Sea Reanalysis, *J. Atmos.*  
770 *Oceanic Technol.*, 28, 569–589., doi:10.1175/2010JTECHO798.1, 2011.
- 771  
772 Alves, J.-H.G.M.: Numerical modeling of ocean swell contributions to the global wind-wave climate, *Ocean Model*, 11, 98–  
773 122. doi:10.1016/j.ocemod.2004.11.007, 2006.
- 774  
775 Álvarez, M., Sanleón-Bartolomé, H., Tanhua, T., Mintrop, L., Luchetta, A., Cantoni, C., et al.: The CO<sub>2</sub> system in the  
776 Mediterranean Sea: a basin wide perspective, *Ocean Sci.* 10, 69–92. doi: 10.5194/os-10-69-2014, 2014.
- 777  
778 Alvarez Fanjul, E., Ciliberti, S., and Baharel, P.: Implementing Operational Ocean Monitoring and Forecasting Systems.,  
779 Paris, France, IOC-UNESCO, 376pp. & Annexes, (GOOS-275). DOI:  
780 <https://doi.org/10.48670/ETOOFShhttps://doi.org/10.48670/ETOOFS>, 2022.
- 781  
782 Ayoub, N., Le Traon, P.-Y., and De Mey: P. A description of the Mediterranean surface variable circulation from combined  
783 ERS-1 and Topex/Poseidon altimetric data, *J. of Mar. Syst.* 18 (1–3), 3–40, 1998.
- 784  
785 Ardhuin, F., Bertotti, L., Bidlot, J. R., Cavaleri, L., Filipetto, V., Lefevre, J. M., and Wittmann, P.: Comparison of wind and  
786 wave measurements and models in the Western Mediterranean Sea, *Ocean Eng.*, 34, 526–541,  
787 <https://doi.org/10.1016/j.oceaneng.2006.02.008>, 2007.
- 788  
789 Artuso, F., Chamard, P., Piacentino, S., Sferlazzo, D. M., De Silvestri, L., Di Sarra, A., and Monteleone, F.: Influence of  
790 transport and trends in atmospheric CO<sub>2</sub> at Lampedusa, *Atmospheric Environment*, 43(19), 3044-3051, 2009.
- 791  
792 Bakker, D. C. E., Pfeil, B., Smith, K., Hankin, S., Olsen, A., Alin, S. R., Cosca, C., et al.: An update to the Surface Ocean  
793 CO<sub>2</sub> Atlas (SOCAT version 2), *Earth Syst. Sci. Data*, 6, 69-90, doi:10.5194/essd-6-69-2014, 2014.
- 794  
795 Barton N.,E. Metzger J., C. A. Reynolds, B. Ruston, C. Rowley, O. M. Smedstad, J. A. Ridout, A. Wallcraft, S. Frolov, P.  
796 Hogan, M. A. Janiga, J. F. Shriver, J. McLay, P. Thoppil, A. Huang, W. Crawford, T. Whitcomb, C. H. Bishop, L. Zamudio,  
797 M. Phelps: The Navy’s Earth System Prediction Capability: A new global coupled atmosphere-ocean-sea ice prediction  
798 system designed for daily to subseasonal forecasting. Barton N., Metzger E. J., Reynolds, C. A., Ruston, B., Rowley, C.,  
799 Smedstad, O. M., et al.: The Navy’s Earth System Prediction Capability: A new global coupled atmosphere-ocean-sea ice  
800 prediction system designed for daily to subseasonal forecasting, *Earth Space Sci.* 8, e2020EA001199, 2021.
- 801  
802 Bergamasco, A. and Malanotte-Rizzoli, P.: The circulation of the Mediterranean Sea: a historical review of experimental  
803 investigations, *Adv. Oceanogr. Limnol.* 1:1, 11-28, DOI: 10.1080/19475721.2010.491656, 2010.
- 804  
805 Brassington, G. B.: Forecast Errors, Goodness, and Verification in Ocean Forecasting. *Journal of Marine Research*, Volume  
806 75, Number 3, pp. 403-433(31). <https://doi.org/10.1357/002224017821836851>, 2017.
- 807  
808 Bruschi, A., Lisi, I., De Angelis, R., Querin, S., Cossarini, G., Di Biagio, V., et al.: Indexes for the assessment of bacterial  
809 pollution in bathing waters from point sources: The northern Adriatic Sea CADEAU service, *Journal of Environmental*  
810 *Management*, 293, 112878, 2021.
- 811  
812 Byun, D. S. and Pinardi, N.: Comparison of Marine Insolation Estimating methods in the Adriatic Sea, *Ocean Sci. J.* 42(4),  
813 211–222, 2007.
- 814

815 Buongiorno Nardelli, B., Tronconi, C., Pisano, A., and Santoleri, R.: High and Ultra-High resolution processing of satellite  
816 Sea Surface Temperature data over Southern European Seas in the framework of MyOcean project, *Rem. Sens. Env.*, 129, 1-  
817 16, doi:10.1016/j.rse.2012.10.012, 2013.

818

819 Buga, L., Sarbu, G., Fryberg, L., Magnus, W., Wesslander, K., Gatti, J., et al.: EMODnet Chemistry Eutrophication and  
820 Acidity aggregated datasets v2018, <https://doi.org/10.6092/EC8207EF-ED81-4EE5-BF48-E26FF16BF02E>, 2018.

821

822 Canu, D., Ghermandi, A., Nunes, P., Lazzari, P., Cossarini, G., and Solidoro, C.: Estimating the value of carbon  
823 sequestration ecosystem services in the Mediterranean Sea: An ecological economics approach, *Global Environmental*  
824 *Change*. 32. 10.1016/j.gloenvcha.2015.02.008, 2015.

825

826 Carrassi, A., Bocquet, M., Bertino, L., and Evensen, G.: Data assimilation in the geosciences: An overview of methods, issues,  
827 and perspectives, *Wiley Interdisciplinary Reviews: Climate Change*, 9(5), e535, 2018.

828

829 Cavaleri, L. and Sclavo, M.: The calibration of wind and wave model data in the Mediterranean Sea, *Coast. Eng.* 53, 613–  
830 627, 2006.

831

832 Cessi, P., Pinardi, N., and Lyubartsev, V.: Energetics of Semienclosed Basins with Two-Layer Flows at the Strait, *J. Phys.*  
833 *Oceanogr.*, 44, 967–979. doi: 10.1175/JPO-D-13-0129.1, 2014.

834

835 Ciliberti, S.A., Jansen, E., Coppini, G., Peneva, E., Azevedo, D., Causio, S., et al.: The Black Sea Physics Analysis and  
836 Forecasting System within the Framework of the Copernicus Marine Service. *J. Mar. Sci. Eng.*, 10, 48.  
837 <https://doi.org/10.3390/jmse10010048>, 2022.

838

839 Clementi, E., Oddo, P., Drudi, M., Pinardi, N., Korres, G., and Grandi, A.: Coupling hydrodynamic and wave models: first  
840 step and sensitivity experiments in the Mediterranean Sea, *Oc. Dyn.*, doi: <https://doi.org/10.1007/s10236-017-1087-7>, 2017a.

841

842 Clementi, E., Pistoia, J., Delrosso, D., Mattia, G., Fratianni, C., Storto, A., et al.: A 1/24 degree resolution Mediterranean  
843 analysis and forecast modelling system for the Copernicus Marine Environment Monitoring Service, Extended abstract to the  
844 8th EuroGOOS Conference, Bergen, [http://eurogoos.eu/download/publications/EuroGOOS-2017-Conference-](http://eurogoos.eu/download/publications/EuroGOOS-2017-Conference-Proceedings.pdf)  
845 [Proceedings.pdf](http://eurogoos.eu/download/publications/EuroGOOS-2017-Conference-Proceedings.pdf), 2017b.

846

847 Clementi, E., Pistoia, J., Escudier, R., Delrosso, D., Drudi, M., Grandi, A., et al.: Mediterranean Sea Analysis and Forecast  
848 (CMEMS MED-Currents EAS5 system, 2017-2020) [Data set], Copernicus Monitoring Environment Marine Service  
849 (CMEMS), [https://doi.org/10.25423/CMCC/MEDSEA\\_ANALYSIS\\_FORECAST\\_PHY\\_006\\_013\\_EAS5](https://doi.org/10.25423/CMCC/MEDSEA_ANALYSIS_FORECAST_PHY_006_013_EAS5), 2019.

850

851 Copin-Montegut, C.: Alkalinity and carbon budgets in the Mediterranean Sea. *Global Biogeochemical Cycles*, 7(4), pp. 915-  
852 925, 1993.

853

854 Copernicus Marine In-Situ Team and Copernicus In Situ TAC, Real Time Quality Control for WAVES, CMEMS-INS-  
WAVES-RTQC. <https://doi.org/10.13155/46607>, 2020.

855

856 Cossarini, G., Mariotti, L., Feudale, L., Teruzzi, A., D’Ortenzio, F., Tallandier, V., and Mignot A.: Towards operational 3D-  
857 Var assimilation of chlorophyll Biogeochemical-Argo float data into a biogeochemical model of the Mediterranean Sea,  
*Ocean Model*, 133, 112–128, <https://doi.org/10.1016/j.ocemod.2018.11.005>, 2019.

858

859 Cossarini, G., Querin, S., Solidoro, C., Sannino, G., Lazzari, P., Di Biagio, V., and Bolzon, G.: Development of  
860 BFMCOUPLER (v1.0), the coupling scheme that links the MITgem and BFM models for ocean biogeochemistry  
861 simulations, *Geosci. Model Dev.*, 10, 1423–1445, <https://doi.org/10.5194/gmd-10-1423-2017>, 2017.

862

863 Cossarini G., Lazzari P., and Solidoro, C.: Spatiotemporal variability of alkalinity in the Mediterranean Sea, *Biogeosciences*,  
864 12, 1647–1658, <https://doi.org/10.5194/bg-12-1647-2015>, 2015.

865

866 Cossarini G., Bretagnon M., Di Biagio V., Fanton d'Andon O., Garnesson P., Mangin A., and Solidoro C.: Primary  
867 production, Copernicus Marine Service Ocean State Report, Issue 3, *J. Oper. Oceanogr.*, 12:sup1, s88–s91; DOI:  
868 10.1080/1755876X.2020.1785097, 2020.

869

870 Cossarini, G., Feudale, L., Teruzzi, A., Bolzon, G., Coidessa, G., Solidoro, C., Di Biagio, V., Amadio, C., Lazzari, P.,  
871 Brosich, A. and Salon, S.: High-resolution reanalysis of the Mediterranean Sea biogeochemistry (1999–2019). *Frontiers in*  
872 *Marine Science*, 8, 1537, 2021.

873

874 Deliverable D4.6: SES land-based runoff and nutrient load data (1980 2000), edited by Bouwman L. and van Apeldoorn D.,  
875 2012 PERSEUS H2020 grant agreement n. 287600.

876

877 Delrosso, D.: Numerical modelling and analysis of riverine influences in the Mediterranean Sea, PhD Thesis, Alma Mater  
878 Studiorum Università di Bologna. DOI 10.6092/unibo/amsdottorato/9392, 2020.

879

880 Desroziers, G., Berre, L., Chapnik, B., and Poli, P.: Diagnosis of observation, background and analysis-error statistics in  
881 observation space, *Q.J.R. Meteorol. Soc.* 131: 3385–3396. doi: 10.1256/qj.05.108, 2005.

882

883 Dobricic, S. and Pinardi, N.: An oceanographic three-dimensional variational data assimilation scheme, *Ocean modelling*,  
884 22: 89-105 (2008), doi:10.1016/j.ocemod.2008.01.004, 2008.

885

886 Dobricic, S., Pinardi, N., Adani, M., Tonani, M., Fratianni, C., Bonazzi, A., and Fernandez, V.: Daily oceanographic  
887 analyses by the Mediterranean basin scale assimilation system, *Ocean Sciences*, 3, 149-157, doi:10.5194/os-3-149-2007,  
888 2007.

889

890 Dobricic, S., Dufau C., Oddo P., Pinardi N., Pujol I., and Rio M.-H.: Assimilation of SLA along track observations in the  
891 Mediterranean with an oceanographic model forced by atmospheric pressure, *Ocean Sci.*, 8, 787-795, doi:10.5194/os-8-787-  
892 2012, 2012.

893

894 Dobricic, S., Pinardi, N., Testor, P., and Send, U.: Impact of data assimilation of glider observations in the Ionian Sea  
895 (Eastern Mediterranean), *Dynamics of Atmospheres and Oceans*, 50, 78-92, doi:10.1016/j.dynatmoce.2010.01.001, 2010.

896

897 ECMWF IFS Documentation CY43R1, Part VII: ECMWF Wave Model, Book chapter, ECMWF, 2016.

898

899 Escudier, R., Clementi, E., Omar, M., Cipollone, A., Pistoia, J., Aydogdu, A., et al.: Mediterranean Sea Physical Reanalysis  
900 (CMEMS MED-Currents) (Version 1) [Data set], Copernicus Monitoring Environment Marine Service (CMEMS),  
901 [https://doi.org/10.25423/CMCC/MEDSEA\\_MULTIYEAR\\_PHY\\_006\\_004\\_E3R1](https://doi.org/10.25423/CMCC/MEDSEA_MULTIYEAR_PHY_006_004_E3R1), 2020.

902

903 Escudier, R., Clementi, E., Cipollone, A., Pistoia, J., Drudi, M., Grandi, A., et al.: A High Resolution Reanalysis for the  
904 Mediterranean Sea, *Front. Earth Sci.* 9:702285. doi: 10.3389/feart.2021.702285, 2021.

905

906 Federico, I., Pinardi, N., Coppini, G., Oddo, P., Lecci, R., and Mossa, M.: Coastal ocean forecasting with an unstructured  
907 grid model in the southern Adriatic and northern Ionian seas, *Nat. Hazards Earth Syst. Sci.*, 17, 45–59,  
908 <https://doi.org/10.5194/nhess-17-45-2017>, 2017.

909

910 Fennel, K., Gehlen, M., Brasseur, P., Brown, C.W., Ciavatta, S., Cossarini, G., et al.: Advancing Marine Biogeochemical  
911 and Ecosystem Reanalyses and Forecasts as Tools for Monitoring and Managing Ecosystem Health, *Front. Mar. Sci.*, 6,  
912 UNSP 89, doi: 10.3389/fmars.2019.00089, 2019.

913

914 Feudale, L., Bolzon, G., Lazzari, P., Salon, S., Teruzzi, A., Di Biagio, V., Coidessa, G., and Cossarini, G.: Mediterranean  
915 Sea Biogeochemical Analysis and Forecast (CMEMS MED-Biogeochemistry, MedBFM3 system) (Version 1) [Data set],  
916 Copernicus Monitoring Environment Marine Service (CMEMS),  
917 [https://doi.org/10.25423/CMCC/MEDSEA\\_ANALYSISFORECAST\\_BGC\\_006\\_014\\_MEDBFM3](https://doi.org/10.25423/CMCC/MEDSEA_ANALYSISFORECAST_BGC_006_014_MEDBFM3)  
918 [2021https://doi.org/10.25423/CMCC/MEDSEA\\_ANALYSISFORECAST\\_BGC\\_006\\_014\\_MEDBFM3](https://doi.org/10.25423/CMCC/MEDSEA_ANALYSISFORECAST_BGC_006_014_MEDBFM3) 2021.



919 Flather, R. ARA.: A tidal model of the north–west European continental shelf, *Mem. Soc. R. Sci. Liege*, 10, pp. 141–164,  
920 1976.  
921  
922  
923 Fourrier M., Coppola L., Claustre H., D’Ortenzio F., Sauzède R., and Gattuso, J-P.: A Regional Neural Network Approach  
924 to Estimate Water-Column Nutrient Concentrations and Carbonate System Variables in the Mediterranean Sea: CANYON-  
925 MED. *Front. Mar. Sci.* 2020, 7, 620, 2021.  
926  
927 Giesen, R., Clementi, E., Bajo, M., Federico, I., Stoffelen, A., and Santoleri R.: The November 2019 record high water levels  
928 in Venice, Italy. In: Copernicus Marine Service Ocean State Report, Issue 5, *Journal of Operational Oceanography*, 14:sup1,  
929 s140–s148; DOI: 10.1080/1755876X.2021.1946240, 2021.  
930  
931 Gunther, H., Hasselmann, H., and Janssen, P.A.E.M.: The WAM model cycle 4, DKRZ report n. 4, 1993.  
932  
933 Janssen, P.A.E.M.: Wave induced stress and the drag of air flow over sea wave, *J. Phys. Ocean.*, 19, 745-754, 1989.  
934  
935 Janssen, P.A.E.M.: Quasi-Linear theory of wind wave generation applied to wave forecasting, *J. Phys. Ocean.*, 21, 1631-  
936 1642, 1991.  
937  
938 Johnson, K., Pasqueron De Fommervault, O., Serr, R., D’Ortenzio, F., Schmechtig, C., Claustre, H., and Poteau A.:  
939 Processing Bio-Argo nitrate concentration at the DAC Level, Version 1.1, March 3rd, IFREMER for Argo Data  
940 Management, 22pp. DOI: <http://doi.org/10.13155/46121>, 2018.  
941  
942 Hasselmann, K., On the spectral dissipation of ocean waves due to whitecapping, *Boundary-Layer Meteorol.*, 126, 107 –  
943 127, 1974.  
944  
945 Hasselmann K., Allender J. H., and Barnett, T. P.: Computations and parameterizations of the nonlinear energy transfer in a  
946 gravity wave spectrum. Part II: Parameterizations of the nonlinear energy transfer for application in wave models, *J. Phys.*  
947 *Oceanogr.*, 15, 1378–1391, 1985.  
948  
949 Hasselmann, K., Hasselmann, K., Barnett, T.P., Bouws, E., Carlson, H., Cartwright, D.E., et al.: Measurements of wind–  
950 wave growth and swell decay during the Joint North Sea Wave Project (JONSWAP), *Dtsch. Hydrogr. Z.*, 8, 1–95, 1973.  
951  
952 Hernandez, F., Bertino, L., Brassington, G., Chassignet, E., Cummings J., Davidson F., et al.: Validation and  
953 intercomparison studies within GODAE, *Oceanography* 22(3): 128–143, <https://doi.org/10.5670/oceanog.2009.71>, 2009.  
954  
955 Hernandez, F., Smith, G., Baetens, K., Cossarini, G., Garcia-Hermosa, I., Drevillon, M., et al.: Measuring Performances,  
956 Skill and Accuracy in Operational Oceanography: New Challenges and Approaches, *New Frontiers in Operational*  
957 *Oceanography*, E. Chassignet, A. Pascual, J. Tintoré, and J. Verron, Eds., *GODAE OceanView*, 759-796,  
958 doi:10.17125/gov2018.ch29, 2018.  
959  
960 Katsafados, P., Papadopoulos, A., Korres, G., and Varlas, G.: A fully coupled Atmosphere–Ocean Wave modeling system  
961 (WEW) for the Mediterranean Sea: interactions and sensitivity to the resolved scales and mechanisms, *Geosci. Model Dev.*,  
962 9, 161–173, 2016.  
963  
964 Kempe, S., Pettine M., and Cauwet, G.: Biogeochemistry of european rivers, In Degensempe & Richey eds, *biogeochemistry*  
965 *of Major World Rivers*, SCOPE 42 John Wiley 169-211, 1991.  
966  
967 Komen, G.J., Hasselmann, S., and Hasselmann, K.: On the existence of a fully developed windsea spectrum, *J. Phys. Ocean.*,  
968 14, 1271-1285, 1984.  
969  
970 Komen, G. J., Cavaleri, L., Donelan, M., Hasselmann, K., Hasselmann, S., and Janssen, P.: *Dynamics and modelling of*  
971 *ocean waves*, Cambridge University Press, Cambridge, 1994.

972 Korres, G., Papadopoulos, A., Katsafados, P., Ballas, D., Perivoliotis, L., and Nittis, K.: A 2-year intercomparison of the  
973 WAM-Cycle4 and the WAVEWATCH-III wave models implemented within the Mediterranean Sea, *Mediterranean Marine*  
974 *Science*, 12(1), 129-152, *Mediterranean Marine Science*, 12(1), 129–152.  
975 <https://doi.org/10.12681/mms.57><https://doi.org/10.12681/mms.57>, 2011.

976  
977 Krasakopoulou, E., Souvermezoglou, E., Giannoudi, L., and Goyet, C.: Carbonate system parameters ad anthropogenic CO<sub>2</sub>  
978 in the North Aegean Sea during October 2013. *Continental Shelf Research*, 149, 69-81, 2017.

979  
980 Lazzari, P., Teruzzi, A., Salon, S., Campagna, S., Calonaci, C., Colella, S., Tonani, M., and Crise, A.: Pre-operational short-  
981 term forecasts for the Mediterranean Sea biogeochemistry, *Ocean Sci.*, 6, 25–39, <https://doi.org/10.5194/os-6-25-2010>, 2010.  
982  
983 Lazzari, P., Solidoro, C., Ibello, V., Salon, S., Teruzzi, A., Branger, K., Colella, S., and Crise, A.: Seasonal and inter-annual  
984 variability of plankton chlorophyll and primary production in the Mediterranean Sea: a modelling approach, *Biogeosciences*  
985 2012, 9:217–233, doi:10.5194/bg-9-217-2012, 2012.

986  
987 Lazzari, P., Solidoro, C., Salon, S., and Bolzon, G.: Spatial variability of phosphate and nitrate in the Mediterranean Sea: a  
988 modelling approach, *Deep-Sea Res. Pt. I*, 108, 39–52, <https://doi.org/10.1016/j.dsr.2015.12.006>, 2016.

989  
990 Lazzari, P., Álvarez, E., Terzić, E., Cossarini, G., Chernov, I., D’Ortenzio, F., and Organelli, E.: CDOM Spatiotemporal  
991 Variability in the Mediterranean Sea: A Modelling Study, *J. Mar. Sci. Eng.*, 9(2), 176, 2021.

992  
993 Lionello, P., H. Gunther, and P. A. E. M., Janssen: Assimilation of altimeter data in a global third generation wave model, *J.*  
994 *Geophys. Res.*, 97C, 14 453–14 474, 1992.

995  
996 Lellouche, J.-M., Greiner, E., Le Galloudec, O., Garric, G., Regnier, C., Drevillon, M., et al.: Recent updates on the  
997 Copernicus Marine Service global ocean monitoring and forecasting real-time 1/12° high resolution system, *Ocean Sci.*  
998 *Discuss.* doi: <https://doi.org/10.5194/os-2018-15>, 2018.

999  
1000 Lermusiaux, O.F.J.: Evolving the subspace of the three-dimensional multiscale ocean variability: Massachusetts Bay, *Journal*  
1001 *of Marine Systems* 29, 385–422, [https://doi.org/10.1016/S0924-7963\(01\)00025-2](https://doi.org/10.1016/S0924-7963(01)00025-2) 2001.

1002  
1003 Le Traon, P. Y., Reppucci, A., Alvarez Fanjul, E., Aouf, L., Behrens, A., Belmonte, M., et al.: From Observation to  
1004 Information and Users: The Copernicus Marine Service Perspective, *Front. Mar. Sci.* 6:234. doi: 10.3389/fmars.2019.00234,  
1005 2019.

1006  
1007 Levy, M., Estubier, A., and Madec, G.: Choice of an advection scheme for biogeochemical models. *Geophys. Res. Lett.*, 28.  
1008 Madec, G. and the NEMO system Team, NEMO Ocean Engine, Scientific Notes of Climate Modelling Center (27) - ISSN  
1009 1288-1619, Institut Pierre-Simon Laplace (IPSL) 2019, <http://doi.org/10.5281/zenodo.1464816> 2001

1010  
1011 Madec, G., Delecluse, P., Imbard, M., and Levy, C.: OPA8.1 Ocean general Circulation Model reference m anual. Note du  
1012 Pole de modelisazion, Institut Pierre-Simon Laplace (IPSL), France, 11, 1998.

1013  
1014 Maderich, V., Ilyin, Y., and Lemeshko, E.: Seasonal and interannual variability of the water exchange in the Turkish Straits  
1015 System estimated by modelling, *Mediterr. Mar. Sci.*, [S.l.], v. 16, n. 2, p. 444-459, ISSN 1791-6763,  
1016 doi:<http://dx.doi.org/10.12681/mms.1103>, 2015.

1017  
1018 Mannarini, G. and Carelli, L.: VISIR-1. b: Ocean surface gravity waves and currents for energy-efficient navigation,  
1019 *Geoscientific Model Development*, 12(8), 3449-3480, 2019.

1020  
1021 Marchesiello, P., McWilliams, J.C., and Shchepetkin, A.: Open boundary conditions for long-term integration of regional  
1022 oceanic models, *Ocean modelling*, 3.1–2, pp. 1–20, 2001.

1023 McEwan, R., Kay, S., and Ford, D.: Quality Information Document of  
1024 NWSHELF\_ANALYSISFORECAST\_BGC\_004\_002. Marine Copernicus Service.  
1025 <https://catalogue.marine.copernicus.eu/documents/QUID/CMEMS-NWS-QUID-004-002.pdf>,  
1026 accessed 15 July 2022, 2021.  
1027  
1028 McGovern, J.V., Dabrowski, T., Pereiro, D., Gutknecht, E., Lorente, P., Reffray, G., Aznar, R., and Sotillo, M.G.: Quality  
1029 Information Document of IBI\_ANALYSISFORECAST\_BGC\_005\_004. Marine Copernicus Service.  
1030 <https://catalogue.marine.copernicus.eu/documents/QUID/CMEMS-IBI-QUID-005-004.pdf>, accessed 15 July 2022, 2020.  
1031  
1032 Melsom, A. and Yumruktepe, Ç.: Quality Information Document of ARTIC\_ANALYSIS\_FORECAST\_BIO\_002\_004.  
1033 Marine Copernicus Service. <https://catalogue.marine.copernicus.eu/documents/QUID/CMEMS-ARC-QUID-002-004.pdf>,  
1034 accessed 15 July 2022, 2021.  
1035  
1036 Meybeck, M. and Ragu, A.: River Discharges to the Oceans: An Assessment of suspended solids, major ions and nutrients  
1037 UNEP STUDY, 1995.  
1038  
1039 Milliff, R., Bonazzi, A., Wikle, C.K., Pinardi, N., and Berliner, L. M.: Ocean ensemble forecasting. Part I: Ensemble  
1040 Mediterranean winds from a Bayesian hierarchical model, *Q. J. R. Meteorol. Soc.* 137: 858–878. DOI:10.1002/qj.767, 2011.  
1041  
1042 Nagy, H., Lyons, K., Nolan, G., Cure, M., and Dabrowski, T.: A Regional Operational Model for the North East Atlantic:  
1043 Model Configuration and Validation, *J. Mar. Sci. Eng.*, 8, 673. <https://doi.org/10.3390/jmse8090673>, 2020.  
1044  
1045 Napolitano, E., Iacono, R., Palma, M., Sannino, G., Carillo, A., Lombardi, E., Pisacane, G. and Struglia, M.V.: MV (2022)  
1046 MITO: A new operational model for the forecasting of the Mediterranean sea circulation,. *Front. Energy Res.* 10:941606.  
1047 doi: 10.3389/fenrg.2022.941606, 2022.  
1048  
1049 Oddo, P., Adani, M., Pinardi, N., Fratianni, C., Tonani, M., and Pettenuzzo, D.: A Nested Atlantic-Mediterranean Sea  
1050 General Circulation Model for Operational Forecasting, *Ocean Sci.*, 5, 461-473, doi:10.5194/os-5-461-2009, 2009.  
1051  
1052 Oddo, P., Bonaduce, A., Pinardi, N., and Guarnieri, A.: Sensitivity of the Mediterranean sea level to atmospheric pressure  
1053 and free surface elevation numerical formulation in NEMO, *Geosci. Model Dev.*, 7, 3001–3015. doi:10.5194/gmd-7-3001-  
1054 2014, 2014.  
1055  
1056 Orlanski, I.: A simple boundary condition for unbounded hyperbolic flows," *Journal of computational physics*, 21.3, pp. 251–  
269, 1976.  
1057  
1058 Pacanowski, R. C., and Philander, S. G. H.: Parameterization of vertical mixing in numerical models of tropical  
1059 oceans. *Journal of Physical Oceanography*, 11, 1443–1451. [https://doi.org/10.1175/1520-0485\(1981\)011<1443:POVMIN>2.0.CO;2](https://doi.org/10.1175/1520-0485(1981)011<1443:POVMIN>2.0.CO;2), 1981.  
1060  
1061 Pettenuzzo, D., Large, W. G., and Pinardi, N.: On the corrections of ERA-40 surface flux products consistent with the  
1062 Mediterranean heat and water budgets and the connection between basin surface total heat flux and NAO, *J. Geophys. Res.*,  
1063 115 (C6), doi:10.1029/2009JC005631, URL <http://dx.doi.org/10.1029/2009JC005631>, 2010.  
1064  
1065 Pinardi, N., Arneri, E., Crise, A., Ravaioli, M., and Zavatarelli, M.: "The physical, sedimentary and ecological structure and  
1066 variability of shelf areas in the Mediterranean Sea" *The Sea*, Vol. 14 (A. R. Robinson and K. Brink Eds.), Harvard  
1067 University Press, Cambridge, USA 1243-1330, 2006.  
1068  
1069 Pinardi, N., and Coppini, G.: Preface "Operational oceanography in the Mediterranean Sea: the second stage of  
1070 development", *Ocean Sci.*, 6, 263–267, <https://doi.org/10.5194/os-6-263-2010>, 2010.  
1071  
1072 Pinardi, N., Zavatarelli, M., Adani, M., Coppini, G., Fratianni, C., Oddo, P., et al.: Mediterranean Sea large-scale low-  
1073 frequency ocean variability and water mass formation rates from 1987 to 2007: A retrospective analysis, *Prog. Oceanogr.*,  
1074 132, 318–332, <https://doi.org/10.1016/j.pocean.2013.11.003>, 2015.

1075  
1076 Pinardi, N., Lermusiaux, P., F. J.; Brink Kenneth, H., Preller Ruth, H.: The Sea: The science of ocean predictions. Journal of  
1077 Marine Research, Volume 75, Number 3, May 2017, pp. 101-102(2), 10.1357/002224017821836833, 2017.  
1078  
1079 Pinardi, N., Cessi, P., Borile, F., and Wolfe, C.L.: The Mediterranean Sea Overturning Circulation, J. Phys. Oceanogr., 49,  
1080 1699–1721, doi: 10.1175/JPO-D-18-0254.1, 2019.  
1081  
1082 Pineau-Guillou, L., Arduin, F., Bouin, M.-N., Redelsperger, J.-L., Chapron, B., Bidlot, J.-R., and Quilfen Y.: Strong winds  
1083 in a coupled wave-atmosphere model during a North Atlantic storm event: evaluation against observations, Quarterly Journal  
1084 of the Royal Meteorological Society, 144(711), Part B, 317-332.  
1085 <https://doi.org/10.1002/qj.3205><https://doi.org/10.1002/qj.3205>, 2018.  
1086  
1087 Pistoia, J., Clementi, E., Delrosso, D., Mattia, G., Fratianni, C., Drudi, M., et al.: Last improvements in the data assimilation  
1088 scheme for the Mediterranean Analysis and Forecast system of the Copernicus Marine Service, Extended abstract to the 8th  
1089 EuroGOOS Conference 2017, Bergen, <http://eurogoos.eu/download/publications/EuroGOOS-2017-Conference->  
1090 [Proceedings.pdf](http://eurogoos.eu/download/publications/EuroGOOS-2017-Conference-), 2017.  
1091  
1092 Ramirez-Romero, E., Jordà, G., Amores, A., Kay, S., Segura-Noguera, M., Macias, D.M., Maynou, F., Sabatés, A., and  
1093 Catalán, I.A.: Assessment of the Skill of Coupled Physical–Biogeochemical Models in the NW Mediterranean, Front. Mar.  
1094 Sci. 7:497. doi: 10.3389/fmars.2020.00497, 2020.  
1095  
1096 Ravdas, M., Zacharioudaki, A., and Korres, G.: Implementation and validation of a new operational wave forecasting system  
1097 of the Mediterranean Monitoring and Forecasting Centre in the framework of the Copernicus Marine Environment  
1098 Monitoring Service, Nat. Hazards Earth Syst. Sci., 18, 2675-2695, <https://doi.org/10.5194/nhess-18-2675-2018>, 2018.  
1099  
1100 Ribera d'Alcalà, M., Civitarese, G., Conversano, F., and Lavezza, R.: Nutrient ratios and fluxes hint at overlooked processes  
1101 in the Mediterranean Sea, Journal of Geophysical Research, 108(C9), 8106, doi:10.1029/2002JC001650, 2003.  
1102  
1103 Robinson, A.R., Leslie, W.G., Theocharis, A., and Lascartos, A.: Mediterranean Sea Circulation. Encyclopedia of Ocean  
1104 Sciences, pp 1689-1705, <https://doi.org/10.1006/rwos.2001.0376>, 2001.  
1105 Lazzari, P., Teruzzi, A., Solidoro, C., Crise, A.: Marine Ecosystem forecasts: skill performance of the CMEMS  
1106 Mediterranean Sea model system. Ocean Sci. Discuss., 1–35, <https://doi.org/10.5194/os-2018-145>, 2019.  
1107  
1108 Salon, S., Cossarini, G., Bolzon, G., Feudale, L., Lazzari, P., Teruzzi, A., et al.: Novel metrics based on Biogeochemical  
1109 Argo data to improve the model uncertainty evaluation of the CMEMS Mediterranean marine ecosystem forecasts,. Ocean  
1110 Science, 15(4), 997-1022, 2019.  
1111  
1112 Schneider, A., Wallace, D. W. R., and Kortzinger, A.: Alkalinity of the Mediterranean Sea, Geophys. Res. Lett., 34, L15608,  
1113 doi:10.1029/2006GL028842, 2007.  
1114  
1115 Schmechtig, C., Poteau, A., Claustre, H., D'Ortenzio, F., Dall'Olmo, G., and Boss, E.: Processing Bio-Argo particle  
1116 backscattering at the DAC level, <https://doi.org/10.13155/39468>, 2018.  
1117  
1118 Semedo, A., Sušelj, K., Rutgersson, A., and Sterl, A.: A global view on the wind sea and swell climate and variability from  
1119 EERA-40, J. Clim. 24 1461–79, 2011.  
1120  
1121 Simoncelli, S., Masina, S., Axell, L., Liu, Y., Salon, S., Cossarini, G., et al.: MyOcean regional reanalyses: overview of  
1122 reanalyses systems and main results, Mercator Ocean J 54: Special issue on main outcomes of the MyOcean2 and MyOcean  
1123 follow-on projects. <https://www.mercator-ocean.fr/wpcontent/uploads/2016/03/JournalMO-54.pdf> , 2016.  
1124  
1125 Simoncelli, S., Fratianni, C., Pinardi, N., Grandi, A., Drudi, M., Oddo, P., and Dobricic, S.: Mediterranean Sea Physical  
1126 Reanalysis (CMEMS MED-Physics) (Version 1) [Data set], Copernicus Monitoring Environment Marine Service  
1127 (CMEMS), [https://doi.org/10.25423/MEDSEA\\_REANALYSIS\\_PHYS\\_006\\_004](https://doi.org/10.25423/MEDSEA_REANALYSIS_PHYS_006_004), 2019.

1128  
1129 Siokou-Frangou, I., Christaki, U., Mazzocchi, M.G., Montresor, M., Ribera d'Alcal, M., Vaqu, D., and Zingone, A.:  
1130 Plankton in the open Mediterranean Sea: a review, *Biogeosciences*, 7 (5):1543–1586, 2010.  
1131  
1132 Snyder, R. L., Dobson, F. W., Elliot, J. A., and Long, R. B.: Array measurements of atmospheric pressure fluctuations above  
1133 surface gravity waves, *J. Fluid Mech.*, 102, 1–59, 1981.  
1134  
1135 Sotillo, M. G., Garcia-Hermosa, I., Drévilion, M., Régnier, C., Szczypta, C., Hernandez, F., Melet, A., and Le Traon, P.Y.:  
1136 Communicating CMEMS Product Quality: evolution & achievements along Copernicus-1 (2015- 2021), *Mercator Ocean*  
1137 *Journal #57*, <https://marine.copernicus.eu/it/node/19306><https://marine.copernicus.eu/it/node/19306>, 2021.  
1138  
1139 Souvermezoglou, E., Krasakopoulou, E., and Pavlidou, A.: Temporal and spatial variability of nutrients and oxygen in the  
1140 North Aegean Sea during the last thirty years. *Mediterranean Marine Science*, 15/4, 805-822, 2014.  
1141  
1142 Spruch L ., Verjovkina, S., Jandt, S., Schwichtenberg, F., Huess, V., Lorkowski, I., and Lagema, P.: Quality Information  
1143 Document of *BALTICSEA\_ANALYSIS\_FORECAST\_BIO\_003\_007*. Marine Copernicus Service.  
1144 <https://catalogue.marine.copernicus.eu/documents/QUID/CMEMS-BAL-QUID-003-007.pdf>, accessed 15 July 2022, 2020.  
1145  
1146 Storto, A., Masina, S., and Navarra, A.: Evaluation of the CMCC eddy-permitting global ocean physical reanalysis system  
1147 (C-GLORS, 1982-2012) and its assimilation components, *Quarterly Journal of the Royal Meteorological Society*, 142, 738–  
1148 758, doi: 10.1002/qj.2673, 2015.  
1149  
1150 Taburet, G., Sanchez-Roman, A., Ballarotta, M., Pujol, M.-I., Legeais, J.-F., Fournier, F.; Faugere, Y., and Dibarboure, G.:  
1151 DUACS DT2018: 25 years of reprocessed sea level altimetry products, *Ocean Sci.*, 15, 1207–1224,  
1152 <https://doi.org/10.5194/os-15-1207-2019>, 2019.  
1153  
1154 Terzic, E., Salon, S., Solidoro, C., Cossarini, G., Teruzzi, A., Miro, A., and Lazzari, P.: Impact of interannually variable  
1155 diffuse attenuation coefficients for downwelling irradiance on biogeochemical modelling, *Ocean Modell.*, OCEMOD-D-20-  
1156 00012R2, 2021.  
1157  
1158 Teruzzi, A., Dobricic, S., Solidoro, C., and Cossarini, G.: A 3D variational assimilation scheme in coupled transport  
1159 biogeochemical models: Forecast of Mediterranean biogeochemical properties, *J. Geophys. Res. Oceans*, 119, 200–217,  
1160 <https://doi.org/10.1002/2013JC009277>, 2014.  
1161  
1162 Teruzzi, A., Bolzon, G., Salon, S., Lazzari, P., Solidoro, C., and Cossarini, G.: Assimilation of coastal and open sea  
1163 biogeochemical data to improve phytoplankton modelling in the Mediterranean Sea, *Ocean Model.* 132, 46–60,  
1164 <https://doi.org/10.1016/j.ocemod.2018.09.007>, 2018.  
1165  
1166 Teruzzi, A., Di Cerbo, P., Cossarini, G., Pascolo, E., and Salon, S.: Parallel implementation of a data assimilation scheme for  
1167 operational oceanography: the case of the OGSTM-BFM model system, *Comput. Geosci.*, 124, 103–114,  
1168 <https://doi.org/10.1016/j.cageo.2019.01.003>, 2019.  
1169  
1170 Teruzzi, A., Bolzon, G., Feudale, L., and Cossarini, G.: Deep chlorophyll maximum and nutricline in the Mediterranean Sea:  
1171 emerging properties from a multi-platform assimilated biogeochemical model experiment, *Biogeosciences*, 18(23), 6147-  
1172 6166, 2021.  
1173  
1174 Thoppil, P.G., Frolov, S., Rowley, C.D., Reynolds C. A., Jacobs G. A., E. Metzger J., et al.: Ensemble forecasting greatly  
1175 expands the prediction horizon for ocean mesoscale variability, *Commun Earth Environ* 2, 89  
1176 <https://doi.org/10.1038/s43247-021-00151-5>, 2021.  
1177  
1178 Toledano, C., Ghanous, M., Lorente, P., Dalphin, A., Aouf, L., and Sotillo, M.G.: Impacts of an Altimetric Wave Data  
1179 Assimilation Scheme and Currents-Wave Coupling in an Operational Wave System: The New Copernicus Marine IBI Wave  
1180 Forecast Service, *J. Mar. Sci. Eng.* 10, 457, <https://doi.org/10.3390/jmse10040457>, 2022.

1181  
1182 Tonani, M., Balmaseda, M., Bertino, L., Blockley, E., Brassington, G., Davidson, F., et al.: Status and future of global and  
1183 regional ocean prediction systems, *J Operational Oceanography* 8:201-220, doi:10.1080/1755876X.2015.1049892, 2015.  
1184  
1185 Tonani, M., Pinardi, N., Dobricic, S., Pujol, I., and Fratianni, C.: A high-resolution free-surface model of the Mediterranean  
1186 Sea, *Ocean Sci.*, 4, 1-14, 2008.  
1187  
1188 Trisolino, P., di Sarra, A., Sferlazzo, D., Piacentino, S.; Monteleone, F., Di Iorio, T., et al.: Application of a Common  
1189 Methodology to Select in Situ CO<sub>2</sub> Observations Representative of the Atmospheric Background to an Italian Collaborative  
1190 Network, *Atmosphere*, 12, 246. <https://doi.org/10.3390/atmos12020246>, 2021.  
1191  
1192 Tugrul, S., Besiktepe, T., and Salihoglu, I.: Nutrient exchange fluxes between the Aegean and Black Seas through the  
1193 Marmara Sea, *Mediterranean Marine Science*, 3/1, 33-42, 2002.  
1194  
1195 Vandenbulcke L., Capet A., and Grégoire M.: Quality Information Document of  
1196 BLKSEA\_ANALYSIS\_FORECAST\_BIO\_007\_010, Marine Copernicus Service,  
1197 <https://catalogue.marine.copernicus.eu/documents/QUID/CMEMS-BS-QUID-007-010.pdf>, accessed 15 July 2022, 2021.  
1198  
1199 Verri, G., Pinardi, N., Bryan, F., Tseng, Y., Coppini, G., and Clementi, E.: A box model to represent estuarine dynamics in  
1200 mesoscale resolution ocean models, *Ocean Modelling*. <http://dx.doi.org/10.1016/j.ocemod.2020.101587>  
1201 <http://dx.doi.org/10.1016/j.ocemod.2020.101587>, 2020.  
1202  
1203 Vichi M., Lovato, T., Butenschön, M., Tedesco, L., Lazzari, P., Cossarini, G., et al.: The Biogeochemical Flux Model  
1204 (BFM): Equation Description and User Manual, BFM version 5.2. BFM Report series N. 1, Release 1.2, June 2020,  
1205 Bologna, Italy, <http://bfm-community.eu>, pp. 104, 2020.  
1206  
1207 Vichi, M., Lovato, T., Butenschön, M., Tedesco, L., Lazzari, P., Cossarini, G., Masina, S., Pinardi, N., Solidoro, C., and  
1208 Zavatarelli, M.: The Biogeochemical Flux Model (BFM): Equation Description and User Manual. BFM version 5.2. BFM  
1209 Report series N. 1, Release 1.2, June 2020, Bologna, Italy, <http://bfm-community.eu>, pp. 104, 2020.  
1210  
1211 Volpe, G., Colella, S., Brando, V. E., Forneris, V., Padula, F. L., Cicco, A. D., et al.: Mediterranean ocean colour Level 3  
1212 operational multi-sensor processing, *Ocean Science*, 15(1), 127-146, 2019.  
1213  
1214 von Schuckmann, K., Le Traon, P.-Y., Alvarez Fanjul, E., Axell, L., Balmaseda, M., Breivik, L.-A., et al.: The Copernicus  
1215 Marine Environment Monitoring Service Ocean State Report, *Journal of Operational Oceanography*, 9:sup2, s235-s320,  
1216 DOI: 10.1080/1755876X.2016.1273446, 2016.  
1217  
1218 von Schuckmann K., Le Traon, P.-Y., Smith, N., Pascual, A., Bresseur, P., Fennel, K., et al.: Copernicus Marine Service  
1219 Ocean State Report, *Journal of Operational Oceanography*, 11:sup1, S1-S142, DOI: 10.1080/1755876X.2018.1489208,  
1220 2018.  
1221  
1222 von Schuckmann K., Le Traon, P.-Y., Smith, N., Pascual, A., Djavidnia, S., Gattuso, J.-P., et al.: Copernicus Marine Service  
1223 Ocean State Report, Issue 3, *Journal of Operational Oceanography*, 12:sup1, S1-S123, DOI:  
1224 10.1080/1755876X.2019.1633075, 2019  
1225  
1226 von Schuckmann, K., Le Traon, P.-Y., Smith, N., Pascual, A., Djavidnia, S., Gattuso, J.-P., et al.: Copernicus Marine Service  
1227 Ocean State Report, Issue 4. *J.Op. Oceanogr.*, 13, <https://doi.org/10.1080/1755876X.2020.1785097>, 2020.  
1228  
1229 Zodiatis, G., Lardner, R., Lascaratos, A., Georgiou, G., Korres, G., and Syrimis, M.: High resolution nested model for the  
1230 Cyprus, NE Levantine Basin, eastern Mediterranean Sea: implementation and climatological runs, *Ann. Geophys.*, 21, 221–  
1231 236, <https://doi.org/10.5194/angeo-21-221-2003>, 2003.  
1232

1233 WAMDI Group. The WAM model—a third generation ocean wave prediction model, *J. Phys. Oceanogr.*, 18:1775–1810.  
1234 [https://doi.org/10.1175/1520-0485\(1988\)018<1775:TWMTGO>2.0.CO;2](https://doi.org/10.1175/1520-0485(1988)018<1775:TWMTGO>2.0.CO;2), 1988.  
1235  
1236 Wanninkhof, R.: Relationship between wind speed and gas exchange over the ocean revisited, *Limnol. Oceanogr. Methods*  
1237 12, 351–362. <https://doi.org/10.4319/lom.2014.12.351>, 2014.  
1238  
1239 Weatherall, P., Marks, K. M., Jakobsson, M., Schmitt, T., Tani, S., Arndt, J. E., Rovere, M., Chayes, D., Ferrini, V. and  
1240 Wigley, R.: A new digital bathymetric model of the world's oceans, *Earth and space Science*, 2(8), 331-345, 2015.  
1241  
1242 Yalcin, B., Artuz, M.L., Pavlidou, A., Cubuk, S., and Dassenakis, M.: Nutrient dynamics and eutrophication in the Sea of  
1243 Marmara: data from recent oceanographic research. *Science of the Total Environment*, 601-602, 405-424, 2017.  
1244  
1245 Young, I.R.: Seasonal variability of the global ocean wind and wave climate, *Int. J. Climatol.* 19, 931–950.  
1246 [doi:10.1002/\(SICI\)1097-0088\(199907\)19:93.0.CO;2-O](https://doi.org/10.1002/(SICI)1097-0088(199907)19:93.0.CO;2-O), 1999.  
1247  
1248

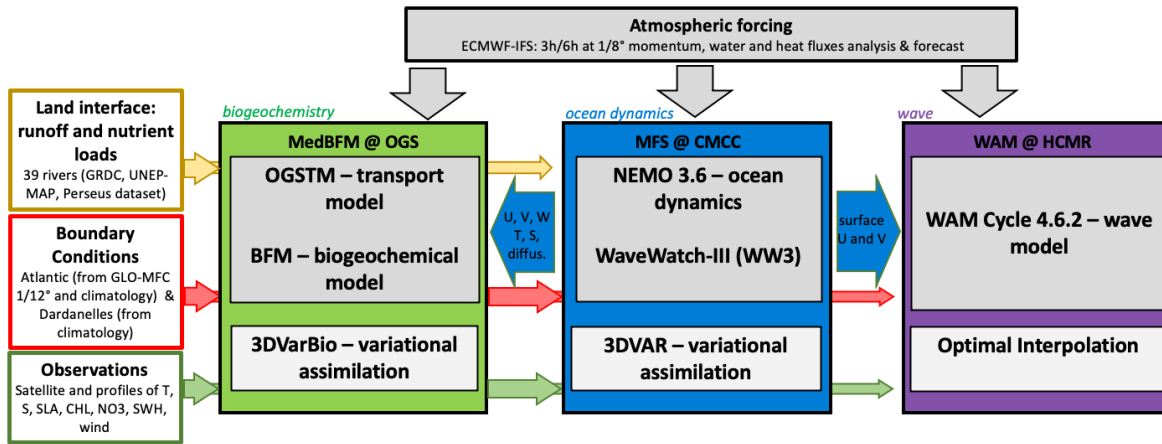

**Figure 1: The Med-MFC core components and the off-line coupling scheme. The Blue arrow are the exchanged fields at daily frequency between the three components.**



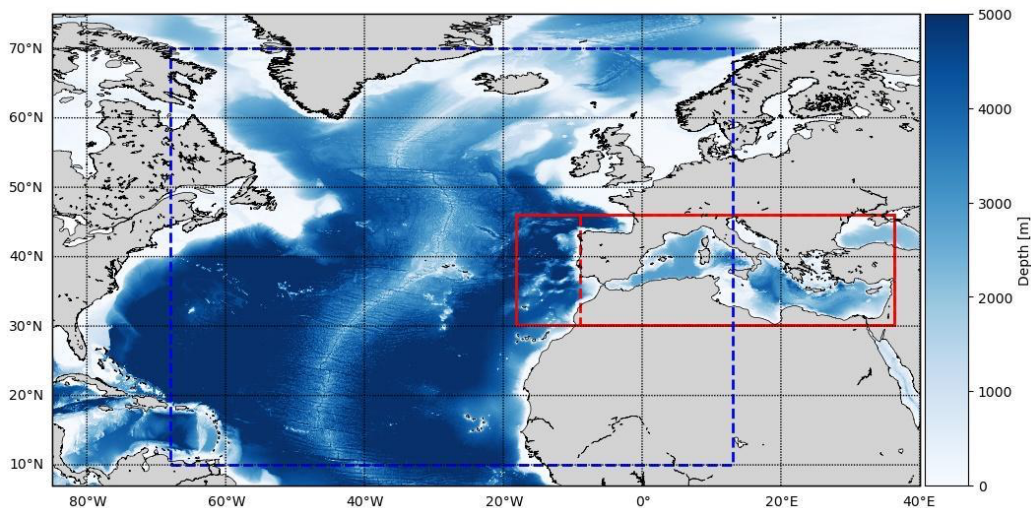

1258

1259 **Figure 2. The solid red box presents the domain of the PHY and WAV Mediterranean components. For BIO the domain extends in**  
 1260 **the Atlantic as far as the dashed red line. The blue box presents one of the WAM domains, producing boundary conditions for the**  
 1261 **Mediterranean WAV component which extends only in the solid red box.**

1262

1263

1264

1265

1266

1267

1268

1269

1270

1271

1272

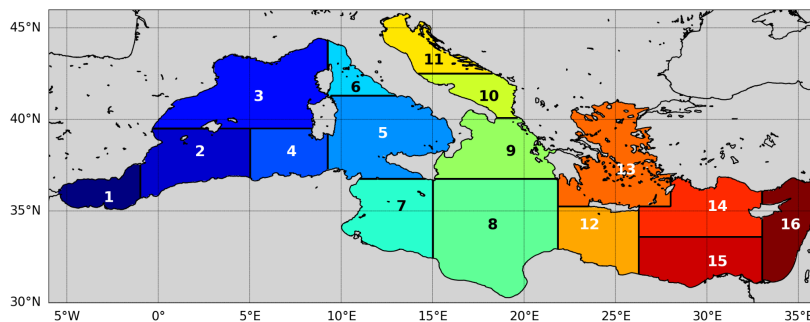

1273

1274

1275 **Figure 3 The Mediterranean Sea domain and sub-regions subdivision for analysis of the skill scores: Albanian (1), South-West**  
 1276 **Mediterranean-1 (2), North-West Mediterranean (3), South-West Mediterranean-2 (4), South Tyrrhenian (5), North Tyrrhenian (6),**  
 1277 **West Ionian (7), East Ionian (8), North-East Ionian (9), South Adriatic (10), North Adriatic (11), West Levantine (12), Aegean (13),**  
**North-Central Levantine (14), South-Central Levantine (15), East Levantine (16).**

1278

1279

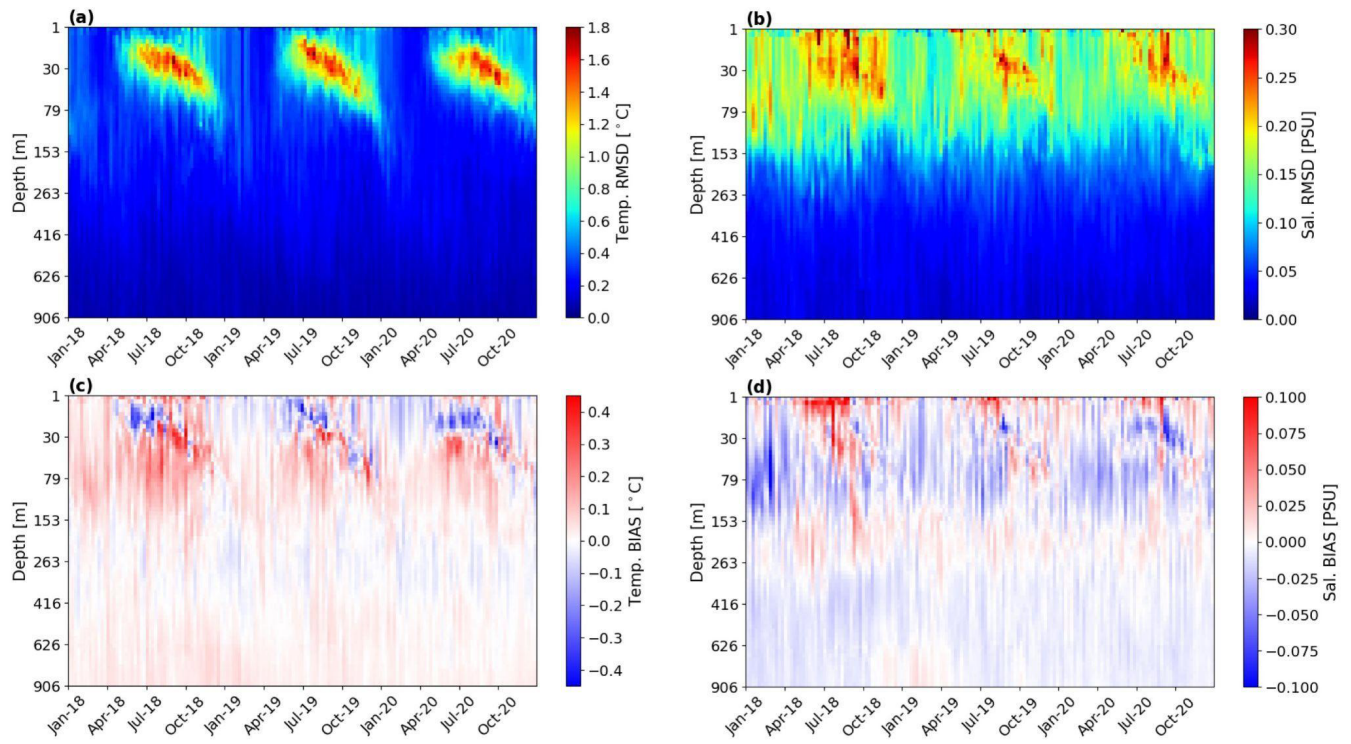

1280

1281 **Figure 4 Hovmoller** (Depth-Time) diagrams: (a) weekly RMS of temperature misfits, (b) weekly RMS salinity misfits, (c) weekly  
 1282 bias of temperature and (d) weekly bias of salinity, evaluated along the water column and averaged in the whole Mediterranean Sea.

1283

1284  
1285  
1286

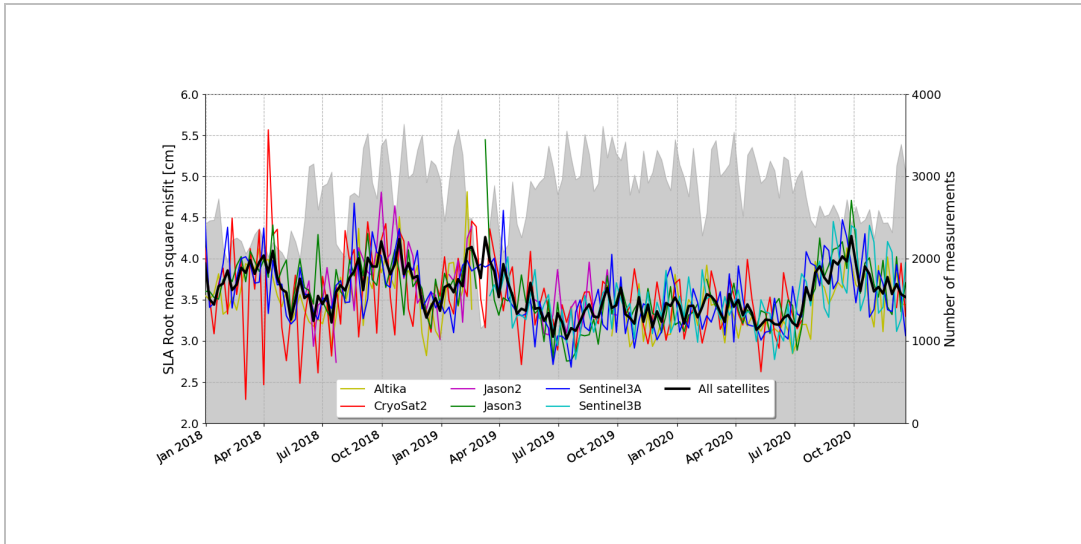

1287 **Figure 5. Time Series of weekly mean RMS misfit error for SLA evaluated with respect to available satellite altimeters and averaged**  
1288 **in the whole Mediterranean Sea. Black bold line represents the mean error with respect to the whole set of satellites which are**  
1289 **separately shown with different colours. The grey area indicates the number of observations used for the validation.**

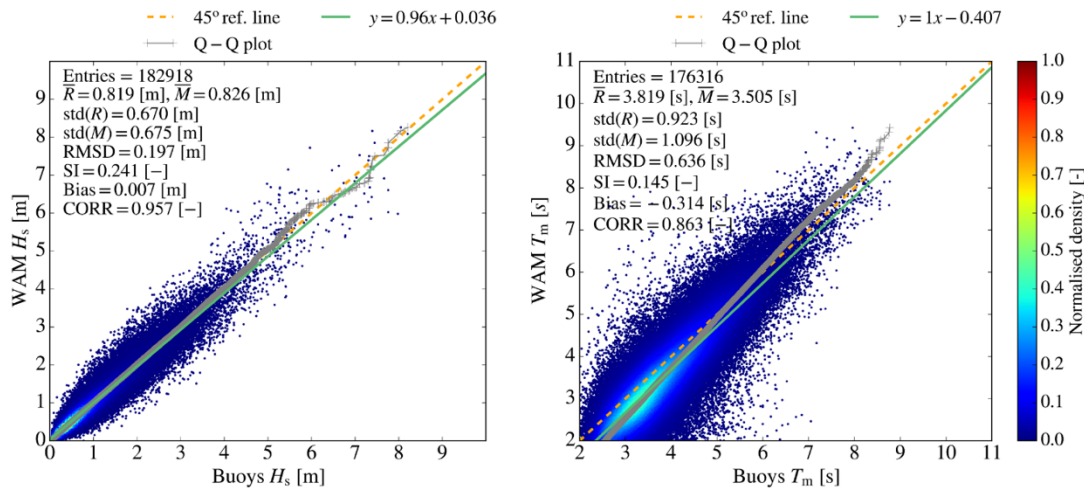

1291

1292

1293

1294

1295

1296

1297

**Figure 6. Scatter plots of: (left) significant wave height ( $H_s$ ); (right) mean wave period ( $T_m$ ) versus wave buoy observations, for the 28 stations of the Mediterranean Sea (bottom panel of Figure 7), for a three-year period (2018–2020). The graphs also include quantile-quantile plots (grey crosses), 45° reference lines (dashed orange line), and least-squares best fit lines (green line). On the top left of each picture statistical scores are given: entries refer to the number of data available for computing the statistics,  $R$ ,  $M$  refer to the observed and modelled value respectively, SI is the Scatter Index (defined as the standard deviation of model-observation differences relative to the observed mean), and CORR is the Pearson correlation coefficient.**

1298

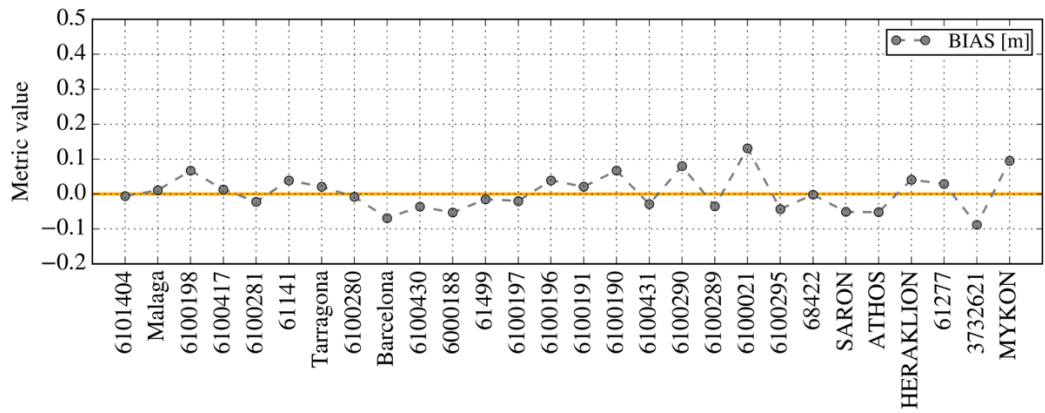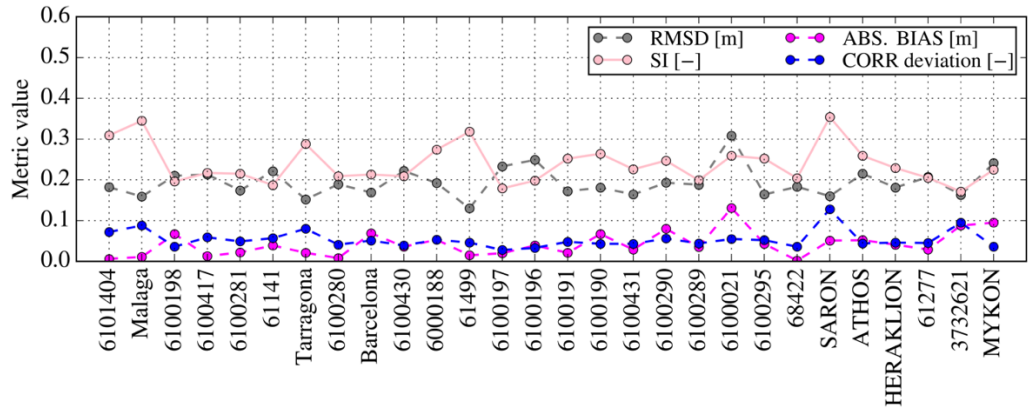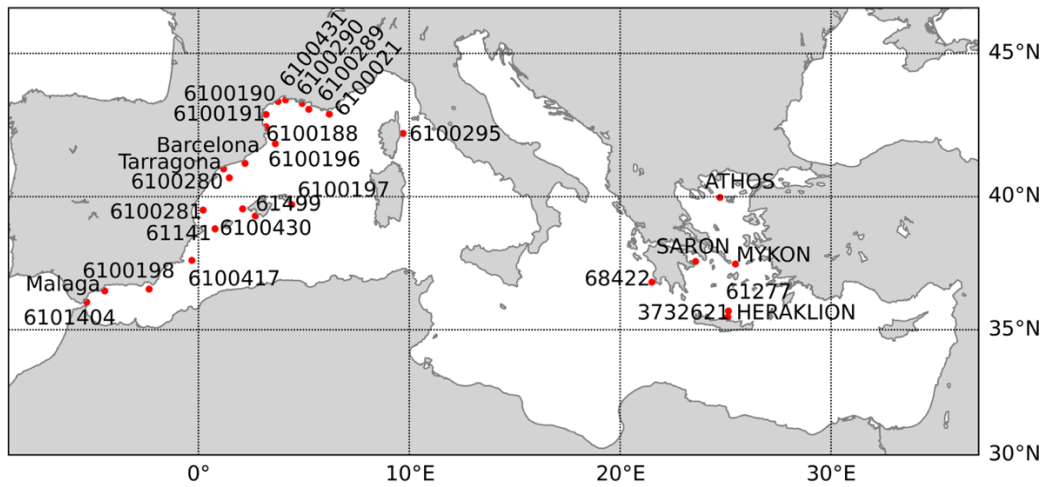

1299

1300  
1301  
1302  
1303

**Figure 7. Significant wave height difference between model and observations (upper and middle graph) at the 28 buoy locations (lower panel) for a three-year period (2018-2020). For all locations, the performance of the model is evaluated against buoy data by means of bias, root mean square difference (RMSD), Scatter Index (SI), and deviations of the Pearson correlation coefficient from unity (CORR deviation).**

1304  
1305  
1306  
1307  
1308  
1309  
1310  
1311

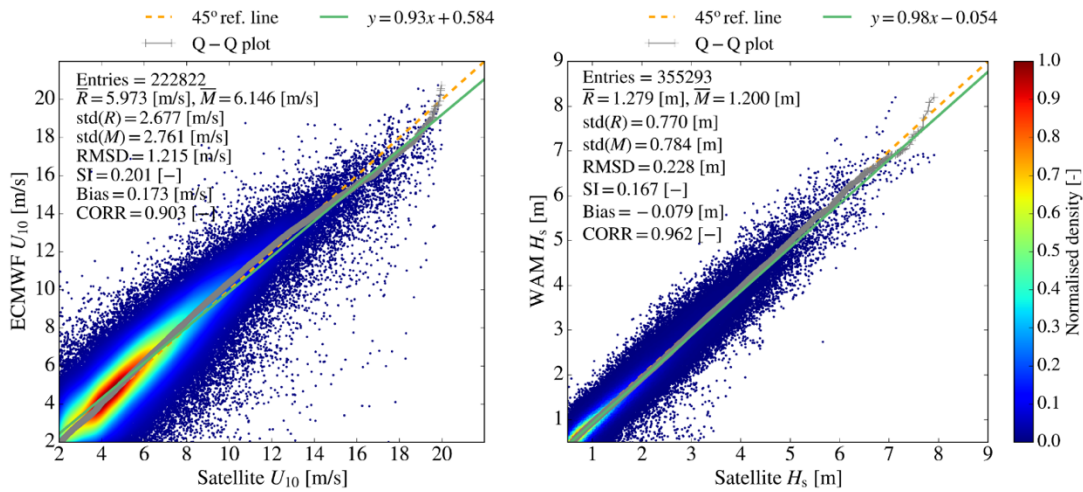

1312  
1313  
1314  
1315  
1316  
1317  
1318

**Figure 8. Scatter plots of: ECMWF forcing wind speed U10 versus satellite U10 observations (left) and model significant wave height (Hs) versus satellite observations over the entire Mediterranean basin, for the three-year period (2018 – 2020).**

1319  
1320

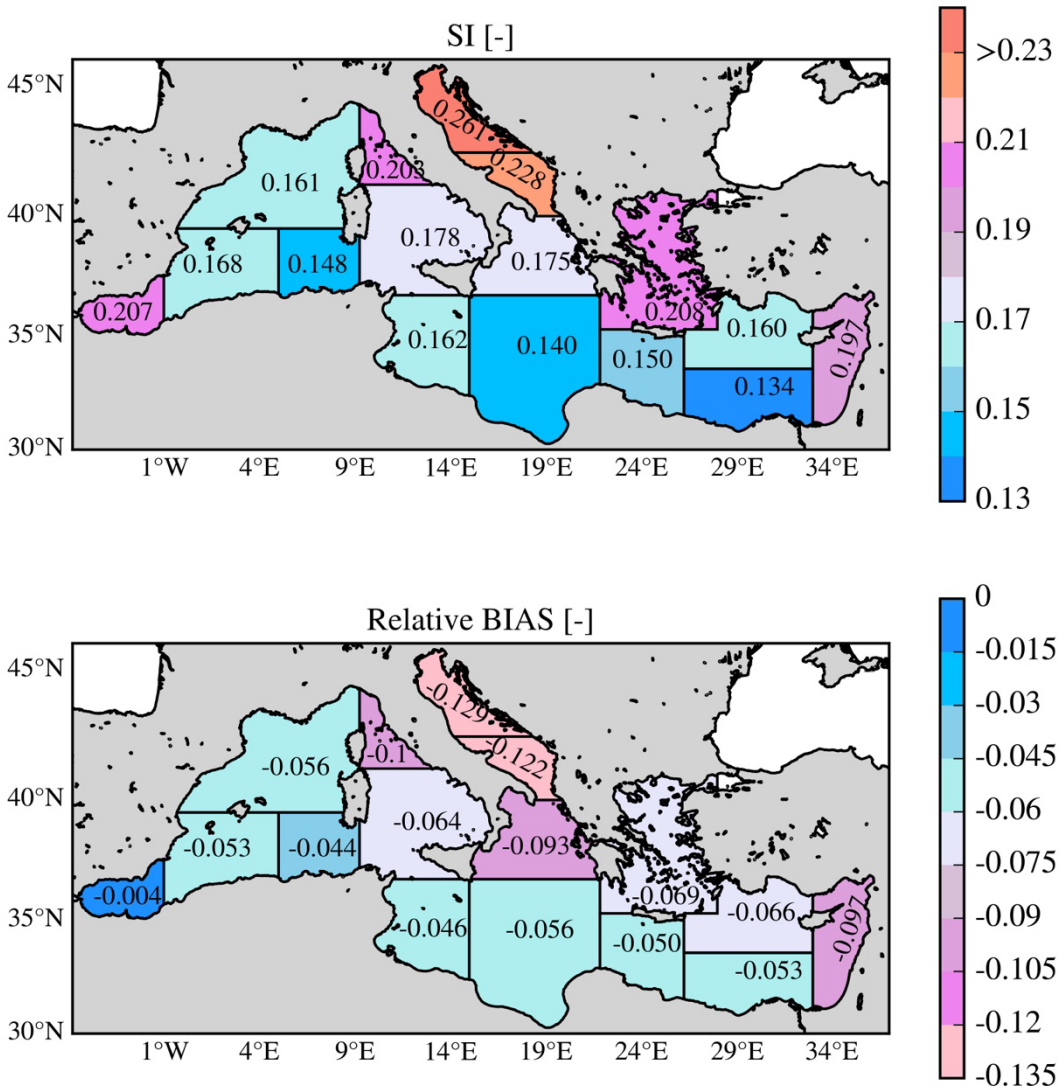

1321  
1322  
1323

Figure 9. SWH evaluation against satellite data: maps of Scatter Index (SI) (top) and Relative BIAS (bottom) over the Mediterranean Sea sub-regions (shown in Figure 3) for the three-year period (2018-2020).

1324  
1325  
1326  
1327

1328  
1329  
1330  
1331  
1332

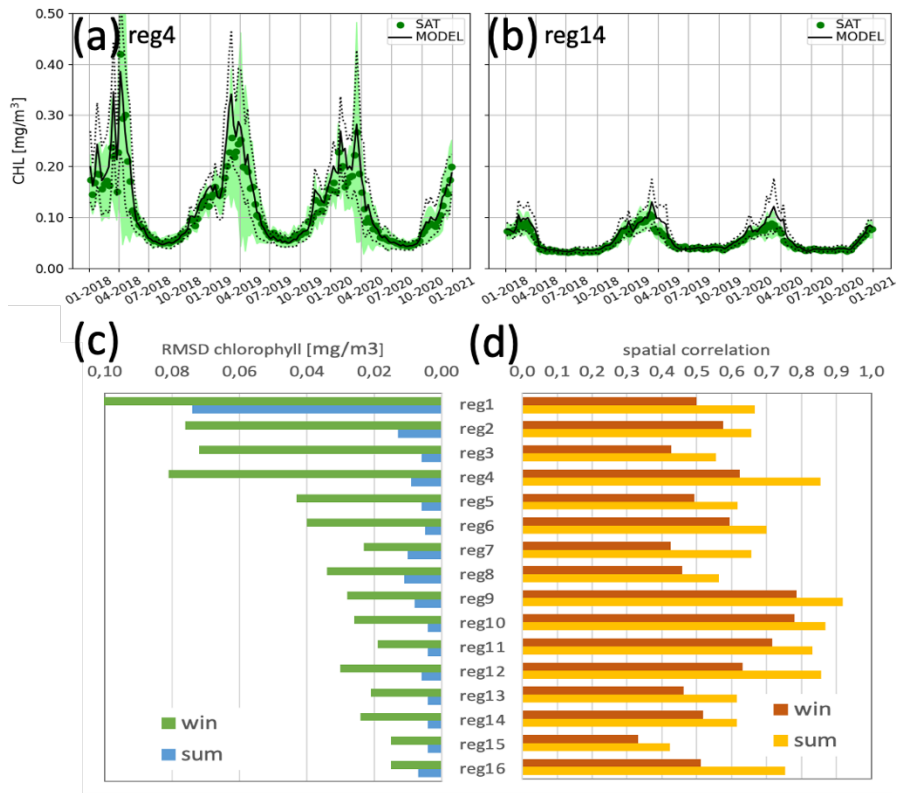

1333 **Figure 10.** Timeseries of surface chlorophyll for centred composite 7-day satellite (green) and the model analysis (black) in two  
1334 selected sub-regions (a and b). RMS of differences (c) and Pearson correlation (d) between maps of satellite and model forecast for  
1335 the day before the assimilation in the 16 sub-regions of Figure Fig.5(c). Metrics are averaged over the winter (from Oct to Apr) and  
1336 summer (from May to September) periods.

1337  
1338



1339  
1340  
1341  
1342

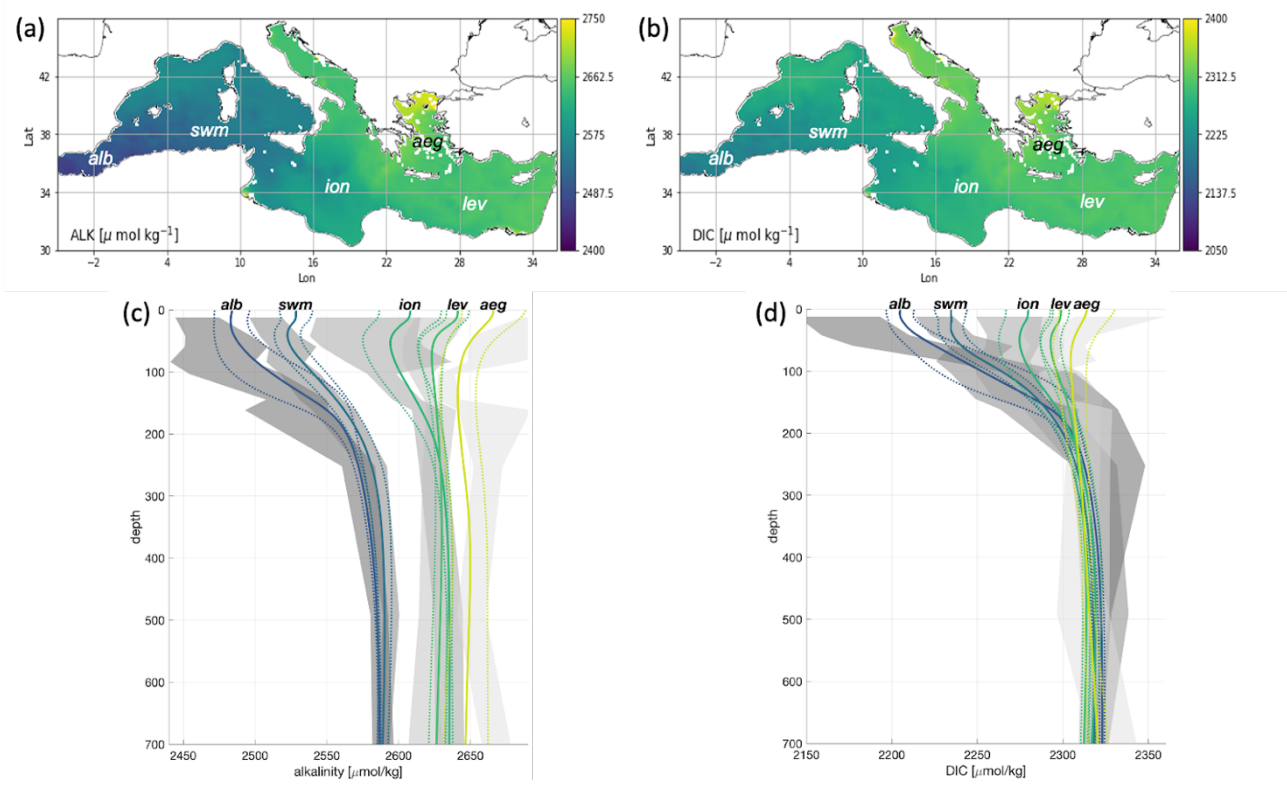

1343  
1344  
1345  
1346  
1347  
1348

Figure 11. Spatial distribution of modelled DIC (a) and alkalinity (b) and comparison of vertical profiles of DIC (c) and alkalinity (d) for model (average and range of variability, solid and dashed coloured lines, respectively) and Emodnet climatology (average and range of variability, black dots and lines and grey shaded areas, respectively) for selected macro areas. Climatological data are computed using historical data (Emodnet, 2018; Bakker 2014). The range of variability is the average  $\pm$  standard deviation

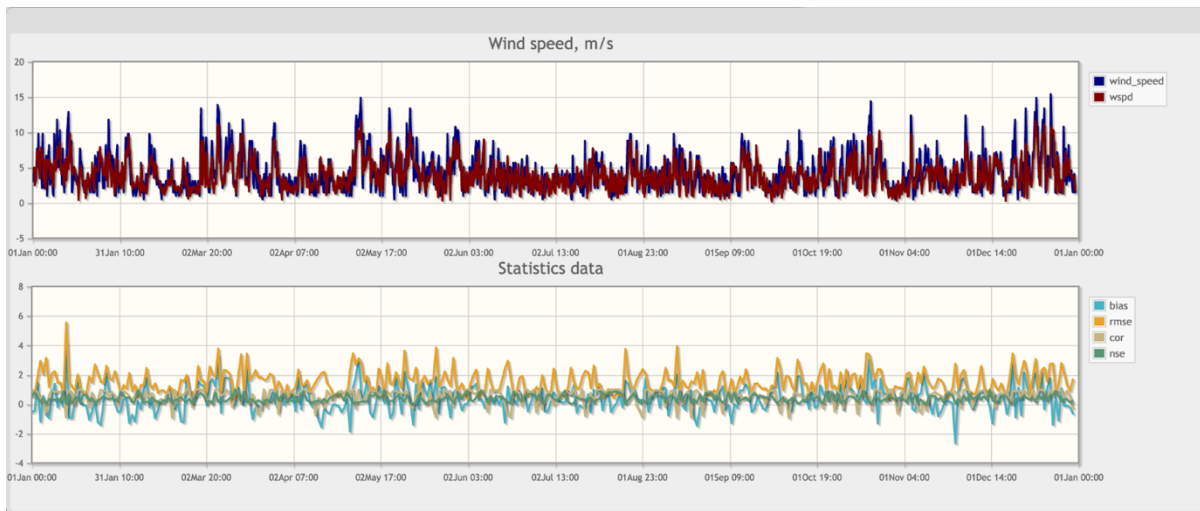

1349

1350

1351

1352

1353

1354

**Figure 12: Example of ECMWF wind speed validation with respect to METAR ground observations in 2019 in the area of the Gulf of Lion. Top panel: time series of daily mean wind speed time series from METAR station (blue line) and from ECMWF (red line). Bottom panel: time series of main skill metrics (bias, RMS Error (RMSE), Correlation Coefficient (cor), Nash-Sutcliffe Model Efficiency Coefficient (nse)).**

1355  
1356  
1357  
1358

**Tables**

1359

Table 1 Changes in the Mediterranean forecasting components since 2008.

| Year                                          | Numerical Model Changes                                                                                                                                                                                                                                                                                      |
|-----------------------------------------------|--------------------------------------------------------------------------------------------------------------------------------------------------------------------------------------------------------------------------------------------------------------------------------------------------------------|
| <b><i>Physics component (PHY)</i></b>         |                                                                                                                                                                                                                                                                                                              |
| < 2008                                        | 1/16 deg., 72 vert. lev., OPA8.2 model (Madec et al., 1998) with closed lateral boundary conditions in the Atlantic (Tonani et al., 2008), 7 rivers (Ebro, Rhone, Nile, Po, Seman, Vjiose, Buna-Bojana), closed lateral boundary at Dardanelles strait, OceanVar (Dobricic et al., 2007) weekly assimilation |
| 2009                                          | As in 2008 with NEMOv3.1 with climatological lateral open boundary conditions in the Atlantic (Oddo et al., 2009), OceanVar with daily assimilation (Dobricic et al., 2007)                                                                                                                                  |
| 2010                                          | As in 2009 with one-way offline coupling between NEMOv3.1 and WAM (wave)                                                                                                                                                                                                                                     |
| 2013                                          | As in 2010 with two-way coupling between NEMOv3.4 and WW3 (Clementi et al., 2017a)                                                                                                                                                                                                                           |
| 2014                                          | As in 2013 but with surface atmospheric pressure forcing (Oddo et al., 2014), explicit linear free surface and SLA TAPAS(*) data assimilation (Dobricic et al., 2012)                                                                                                                                        |
| 2015                                          | As in 2014 but with daily lateral open boundary conditions in the Atlantic                                                                                                                                                                                                                                   |
| 2016                                          | As in 2015 but with monthly and grid point EOF and vertical observational error varying with depth in OceanVar                                                                                                                                                                                               |
| 2017                                          | 1/24 deg., 141 vert. lev., NEMOv3.6 with nonlinear free surface and z-star coordinate system), 39 rivers (Table A.4)                                                                                                                                                                                         |
| 2019                                          | As in 2017 but with open lateral boundary conditions at the Dardanelles Strait, improved SST nudging                                                                                                                                                                                                         |
| <b><i>Biogeochemistry component (BIO)</i></b> |                                                                                                                                                                                                                                                                                                              |
| <2008                                         | 1/8 deg BFM offline coupled to PHY component                                                                                                                                                                                                                                                                 |
| 2009                                          | Offline coupling to horizontal subsampled PHY component at 1/8 deg                                                                                                                                                                                                                                           |
| 2013                                          | Coupling with 1/16 deg PHY component and Biogeochemical Data Assimilation (BDA) for Ocean Color derived Chlorophyll data (Teruzzi et al., 2014)                                                                                                                                                              |
| 2015                                          | Inclusion of the carbonate system in the model (Cossarini et al., 2015)                                                                                                                                                                                                                                      |
| 2017                                          | Revision nutrient formulation in BFM (Lazzari et al., 2016) and coupling with 1/24 deg PHY component including z-star coordinate system                                                                                                                                                                      |
| 2018                                          | BDA for Ocean Color coastal data (Teruzzi et al., 2018)                                                                                                                                                                                                                                                      |
| 2019                                          | Open lateral boundary condition at the Dardanelles Strait, revision daily light cycle in BFM (Salon et al., 2019)                                                                                                                                                                                            |
| 2020                                          | Open lateral boundary condition in the Atlantic Ocean and BDA with Argo biogeochemical data (Cossarini et al., 2019), and daily operational 10-days of forecast                                                                                                                                              |
| <b><i>Wave component (WAV)</i></b>            |                                                                                                                                                                                                                                                                                                              |
| 2017                                          | 1/24 deg WAM Cycle 4.5.4, one-way offline coupled to PHY component surface currents. Open boundary conditions from North Atlantic implementation of WAM model at 1/6 deg resolution.                                                                                                                         |
| 2018                                          | Implementation of data assimilation for along track Significant Wave Height (SWH) observations from Jason 3 and Sentinel 3a                                                                                                                                                                                  |

|      |                                                                                                                                                                                                              |
|------|--------------------------------------------------------------------------------------------------------------------------------------------------------------------------------------------------------------|
| 2019 | WAM Cycle 4.6.2; assimilation of Cryosat-2 and Saral/Altika SWH observations tuning of wave age parameter; imposition of a limitation to the high frequency part of the spectrum based on Phillips spectrum. |
| 2020 | Assimilation of Sentinel-3b SWH observations t                                                                                                                                                               |

(\*) the Sea Level Anomaly (SLA) TAPAS product is produced to give information about the different corrections of the altimetric original signal.

Table 2. EAN estimates with in-situ observations. The differences (BIAS) and their square values (RMSD) are then averaged over the whole Mediterranean Sea region and 9 vertical layers for years 2018-2020.

| Layer (m) | Temperature RMSD (°C) | Temperature bias (°C) | Salinity RMSD (PSU) | Salinity bias (PSU) |
|-----------|-----------------------|-----------------------|---------------------|---------------------|
| 0-10      | 0.54                  | -0.02                 | 0.19                | 0.01                |
| 10-30     | 0.82                  | -0.04                 | 0.20                | -0.01               |
| 30-60     | 0.85                  | 0.04                  | 0.19                | -0.01               |
| 60-100    | 0.58                  | 0.03                  | 0.16                | -0.02               |
| 100-150   | 0.41                  | -0.01                 | 0.13                | -0.01               |
| 150-300   | 0.28                  | -0.02                 | 0.08                | 0.00                |
| 300-600   | 0.18                  | 0.00                  | 0.05                | -0.01               |
| 600-1000  | 0.09                  | -0.02                 | 0.03                | 0.00                |
| 1000-2000 | 0.05                  | 0.01                  | 0.02                | 0.00                |

Table 3. Gibraltar mean and standard deviation volume transports [Sv] from the Med-PHY numerical system averaged in the period 2018-2020 compared to literature values (current meter observations from October 2004 to January 2009).

| Gibraltar Transport | Model<br>[2018-2020] | Literature                                |                                              |
|---------------------|----------------------|-------------------------------------------|----------------------------------------------|
|                     |                      | Soto-Navarro et al. (2010)<br>[2004-2009] | al. Literature Candela (2001)<br>[1994-1996] |
| Net                 | 0.040±0.017          | 0.038 ± 0.007                             | 0.04 (max: 0.26, min: 0.11)                  |
| Eastward            | 0.91±0.01            | 0.81 ± 0.06                               | 1.01 (max: 1.12, min: 0.91)                  |
| Westward            | 0.87±0.06            | 0.78 ± 0.05                               | 0.97 (max: 0.83, min: 1.11)                  |

1381

1382

1383

Table 4. EAN RMSD and Bias of SST and SLA RMSD averaged in the whole Mediterranean Sea and 16 sub-regions (see Figure 3) for the period 2018-2020.

| <b>Region</b> | <b>Temperature<br/>RMSD (°C)</b> | <b>Temp.<br/>Bias (°C)</b> | <b>Sea Level<br/>Anomaly<br/>RMSD (cm)</b> |
|---------------|----------------------------------|----------------------------|--------------------------------------------|
| MED SEA       | 0.54                             | 0.12                       | 3.8                                        |
| REGION 1      | 0.69                             | -0.05                      | 5.3                                        |
| REGION 2      | 0.53                             | 0.06                       | 4.3                                        |
| REGION 3      | 0.53                             | -0.01                      | 3.2                                        |
| REGION 4      | 0.55                             | 0.15                       | 5.1                                        |
| REGION 5      | 0.47                             | 0.13                       | 3.1                                        |
| REGION 6      | 0.49                             | 0.15                       | 3.5                                        |
| REGION 7      | 0.51                             | 0.22                       | 5.0                                        |
| REGION 8      | 0.55                             | 0.16                       | 3.8                                        |
| REGION 9      | 0.51                             | 0.14                       | 3.4                                        |
| REGION 10     | 0.58                             | 0.20                       | 2.3                                        |
| REGION 11     | 0.63                             | 0.08                       | NA                                         |
| REGION 12     | 0.49                             | -0.01                      | 4.0                                        |
| REGION 13     | 0.59                             | 0.14                       | 3.6                                        |
| REGION 14     | 0.57                             | 0.16                       | 3.3                                        |
| REGION 15     | 0.53                             | 0.13                       | 4.4                                        |
| REGION 16     | 0.52                             | 0.24                       | 3.1                                        |

1384

1385

1386

1387

1388

1389

1390

1391

1392 Table 5. RMS of the difference between MedBFM and Argo-BGC profiles for ecosystem metrics. RMSD of the metrics are computed for  
 1393 each profile, then averaged over time and space considering the 2017-2020 period. Sub-regions: swm (reg2+reg4), nwm (reg3), tyr  
 1394 (reg5+reg6), adr (reg10+reg11), ion (reg7+reg8+reg9) and lev (reg13+reg14+reg15+reg16).

|             | vertical metrics<br>[units]              | mean value<br>[range] | RMSD |      |      |      |      |      |
|-------------|------------------------------------------|-----------------------|------|------|------|------|------|------|
|             |                                          |                       | swm  | nwm  | tyr  | adr  | ion  | lev  |
| Chlorophyll | Average 0-200 m<br>[mg/m3]               | [0.01 - 1.5]          | 0.05 | 0.06 | 0.06 | 0.03 | 0.03 | 0.03 |
|             | Deep chlorophyll<br>maximum depth<br>[m] | 80<br>[60-130]        | 10   | 11   | 7    | 6    | 16   | 18   |
|             | Mixed Bloom<br>Winter depth [m]          | 40<br>[20-90]         | 25   | 39   | 35   | 29   | 16   | 27   |
| Nitrate     | Average 0-200 m<br>[mmol/m3]             | [0.1-8.0]             | -    | 0.72 | 0.45 | -    | 0.52 | 0.54 |
|             | Nitracline depth<br>[m]                  | 90<br>[70-150]        | -    | 48   | 44   | -    | 34   | 42   |
| Oxygen      | Average 0-200 m<br>[mmol/m3]             | 220<br>[190-250]      | 11.5 | 8.5  | 7.9  | 10.8 | 4.7  | 5.7  |
|             | Maximum oxygen<br>depth [m]              | [60-120]              | 24   | 16   | 17   | 19   | 34   | 14   |

1395  
 1396  
 1397  
 1398

1399  
1400

1401 Table 6. RMSD of the difference between model and climatological profiles at different depths evaluated in the 2017-2020 reference period.  
1402 Statistics are computed using the 16 sub-regions in Figure 3. Reference datasets for validation (last column) are: (1) EMODnet data  
1403 collections (Bugu et al., 2018) integrated with additional oceanographic cruises (Cossarini et al., 2015), and (2) Socat dataset (Baker et al  
1404 2014).

1405

| Variable                         | indicative range values | RMSD  |        |        |         |          |          |          |           | data set |
|----------------------------------|-------------------------|-------|--------|--------|---------|----------|----------|----------|-----------|----------|
|                                  |                         | 0-10m | 10-30m | 30-60m | 60-100m | 100-150m | 150-300m | 300-600m | 600-1000m |          |
| Phosphate [mmol/m <sup>3</sup> ] | 0.01-0.70               | 0.03  | 0.03   | 0.027  | 0.023   | 0.043    | 0.028    | 0.040    | 0.027     | 1        |
| Nitrate [mmol/m <sup>3</sup> ]   | 0.1-9.0                 | 0.42  | 0.41   | 0.49   | 0.72    | 0.83     | 0.72     | 1.09     | 0.83      | 1        |
| Ammonia [mmol/m <sup>3</sup> ]   | 0.01-1.23               | 0.41  | 0.17   | 0.15   | 0.23    | 0.30     | 0.32     | 0.44     | 0.54      | 1        |
| Silicate [mmol/m <sup>3</sup> ]  | 0.1-7.0                 | 1.5   | 1.5    | 1.3    | 0.9     | 0.9      | 0.7      | 0.7      | 0.8       | 1        |
| Oxygen [mmol/m <sup>3</sup> ]    | 190-260                 | 5.9   | 5.7    | 6.4    | 4.2     | 5.2      | 4.3      | 8.6      | 5.8       | 1        |
| DIC [μmol/kg]                    | 2100-2400               | 42.2  | 37.6   | 28.1   | 17.1    | 16.7     | 7.7      | 9.9      | 3.8       | 1        |
| Alkalinity [μmol/kg]             | 2360-2730               | 41.7  | 34.4   | 26.0   | 19.1    | 12.5     | 12.1     | 9.0      | 7.0       | 1        |
| pH                               | 7.0-8.2                 | 0.04  | 0.03   | 0.03   | 0.02    | 0.01     | 0.01     | 0.01     | 0.01      | 1        |
| pCO <sub>2</sub> [μatm]          | 250-550                 | 46    |        |        |         |          |          |          |           | 2        |

1406
